# Supplementary material for: N-Benzylethanolammonium Ionic Liquids and Molten Salts in the Synthesis of 68Ga- and Al18F-Labeled Radiopharmaceuticals
Source: MDPI journal article supplement (doi:10.3390/pharmaceutics15020694), 2023-02-18
Supplement: s1 [file s1]

## Supplementary Materials

### N-benzylethanolammonium ionic liquids and molten salts in the synthesis of $^{68}\text{Ga}$ - and $\text{Al}^{18}\text{F}$ -labelled radiopharmaceuticals

Yulia A. Kondratenko, Julia S. Shilova, Vladislav A. Gavrilov, Andrey A. Zolotarev,  
Michail A. Nadporojskii, Tatyana A. Kochina and Dmitrii O. Antuganov

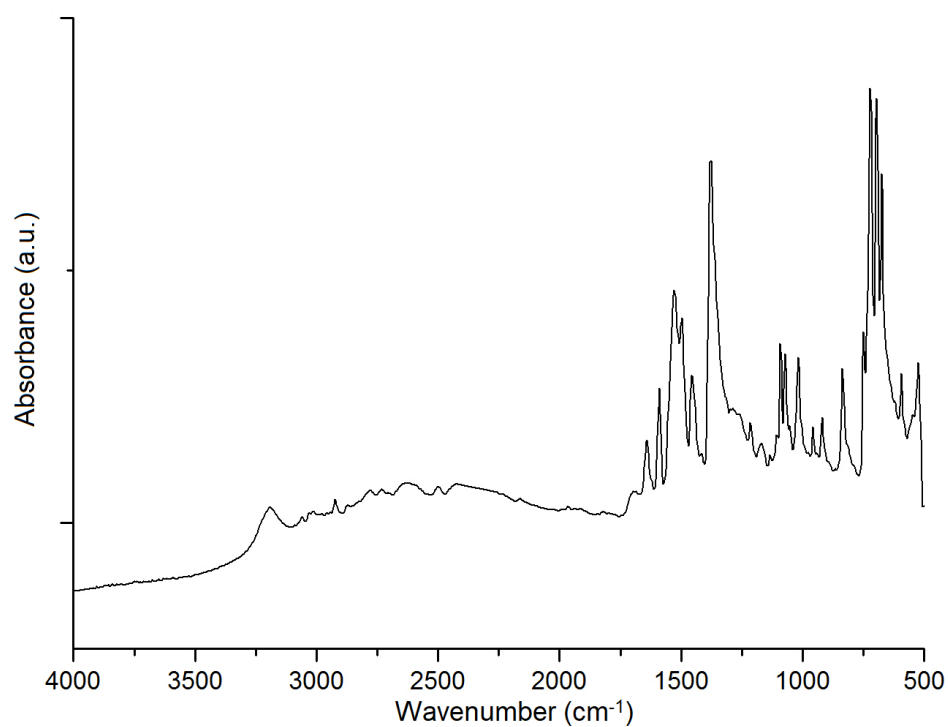

**Figure S1.** ATR-FTIR spectrum of BEA salt **1**

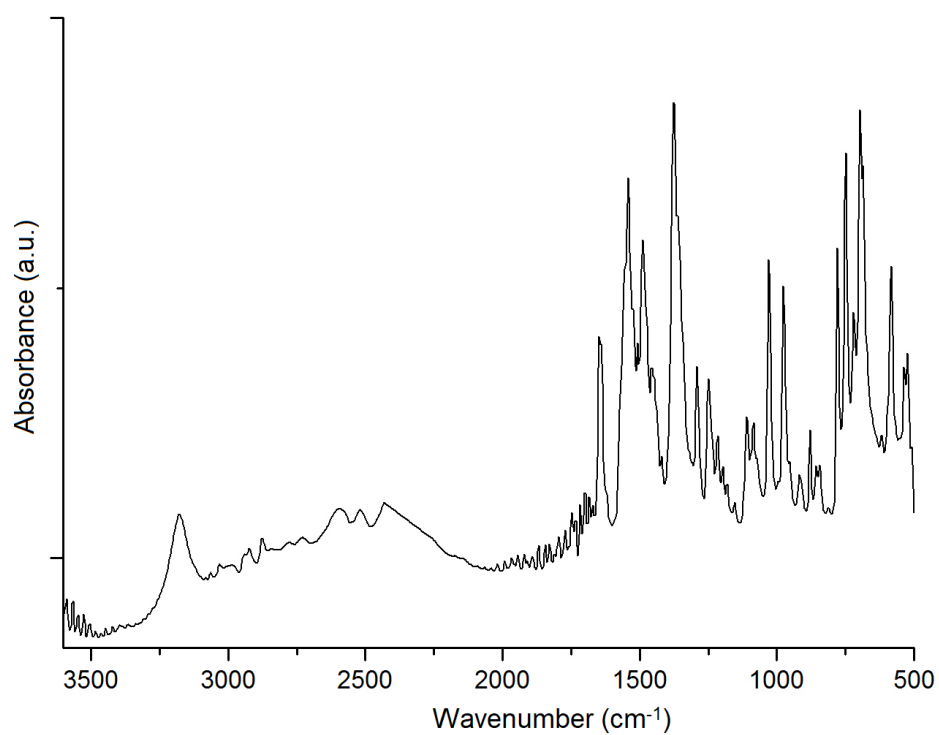

**Figure S2.** ATR-FTIR spectrum of BEA salt 2

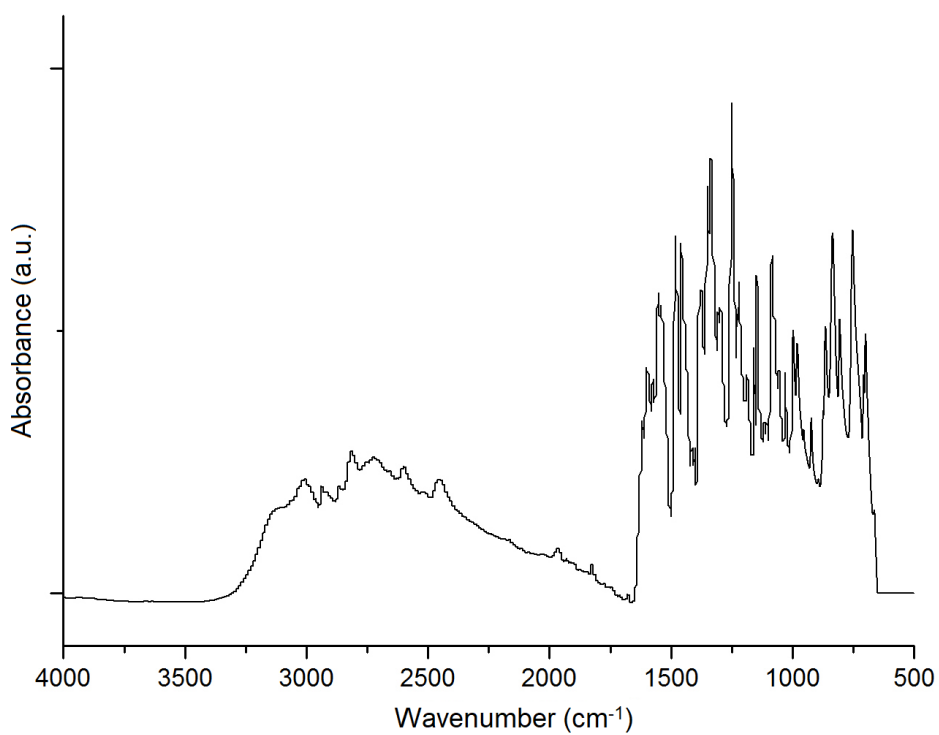

**Figure S3.** ATR-FTIR spectrum of BEA salt 3

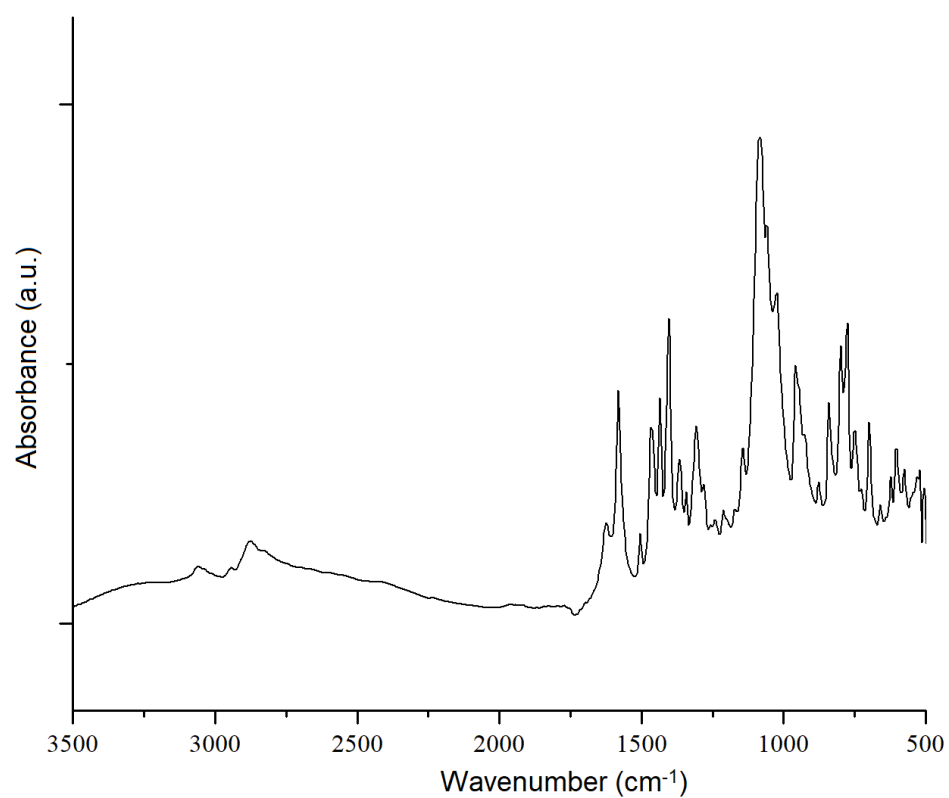

**Figure S4.** ATR-FTIR spectrum of BEA salt **4**

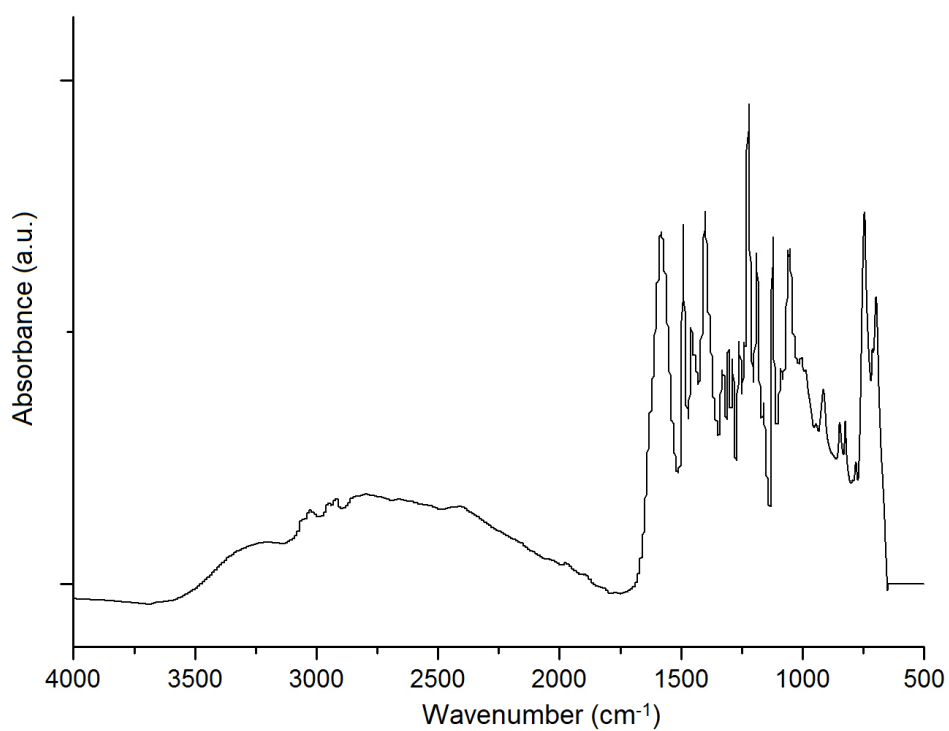

**Figure S5.** ATR-FTIR spectrum of BEA salt **5**

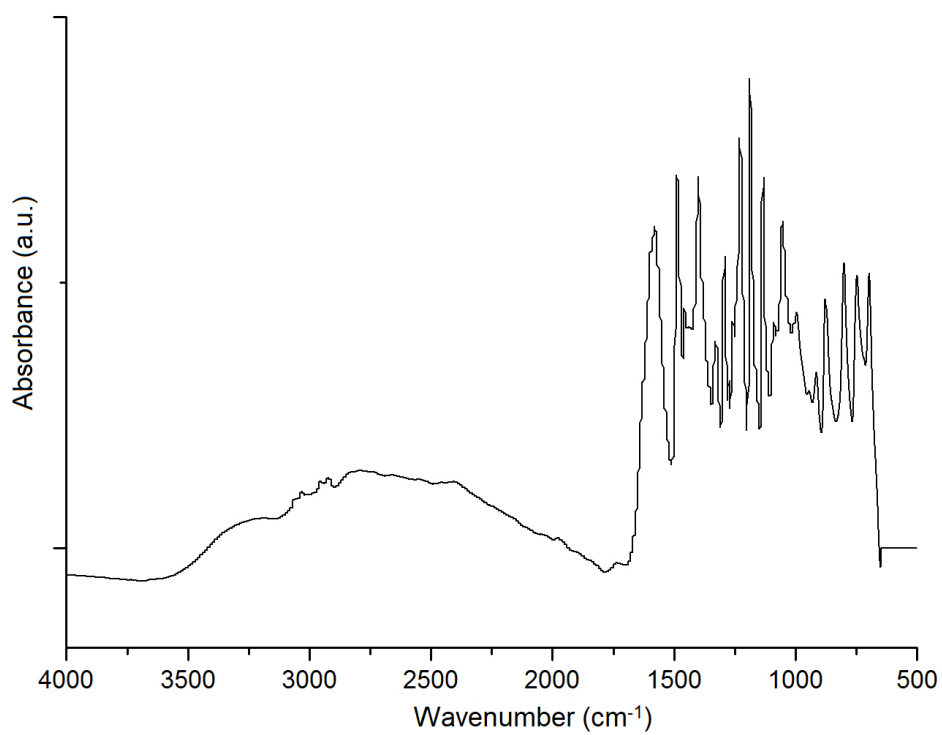

**Figure S6.** ATR-FTIR spectrum of BEA salt **6**

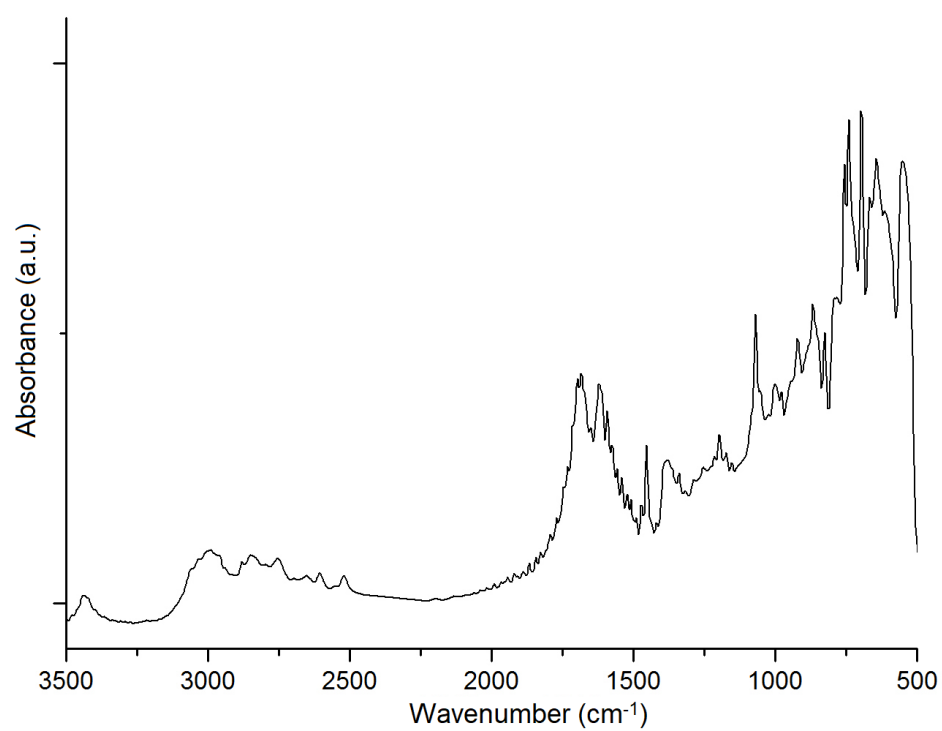

**Figure S7.** ATR-FTIR spectrum of BEA salt **7**

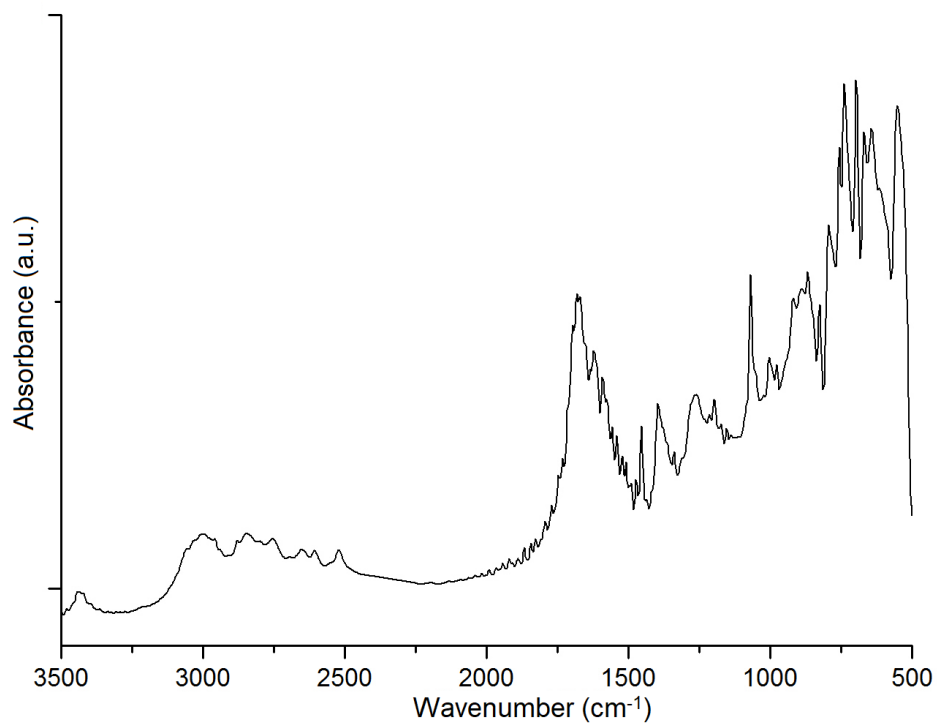

**Figure S8.** ATR-FTIR spectrum of BEA salt **8**

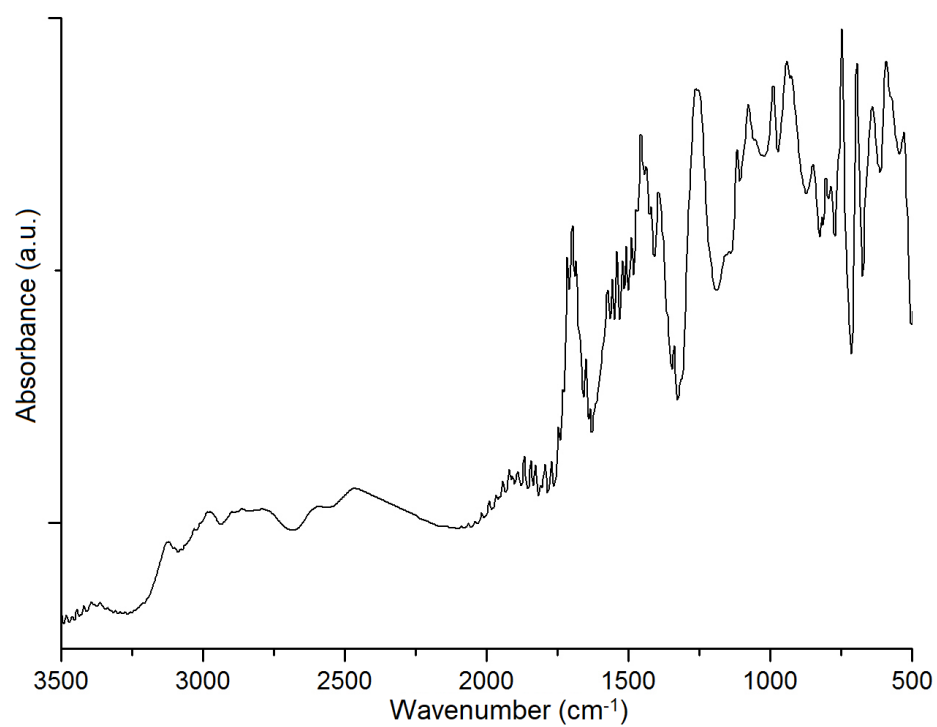

**Figure S9.** ATR-FTIR spectrum of BEA salt **9**

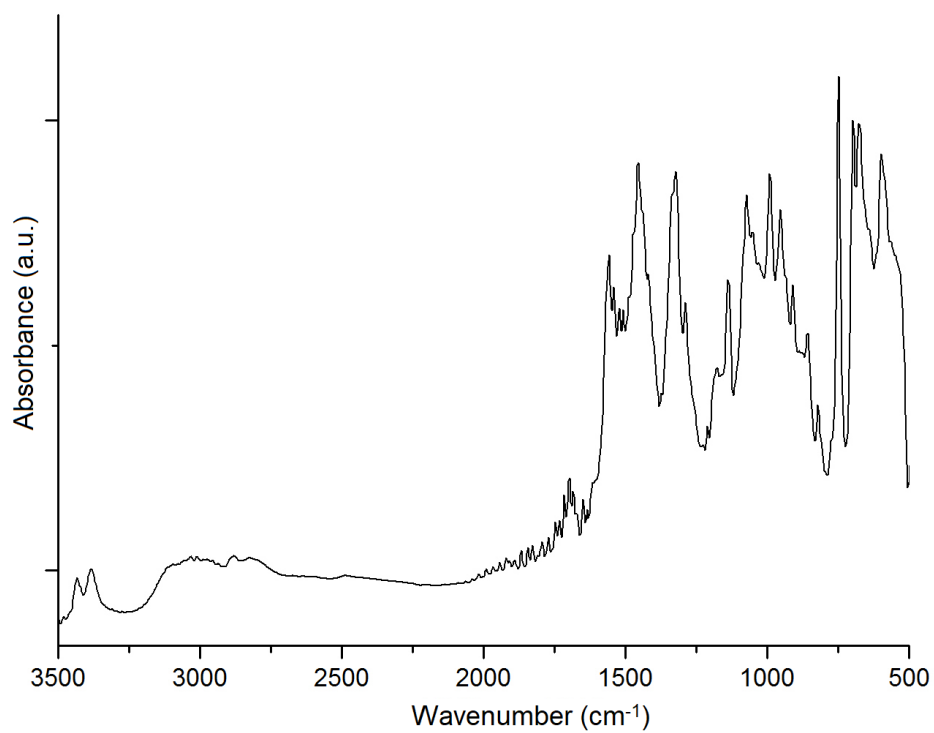

**Figure S10.** ATR-FTIR spectrum of BEA salt **10**

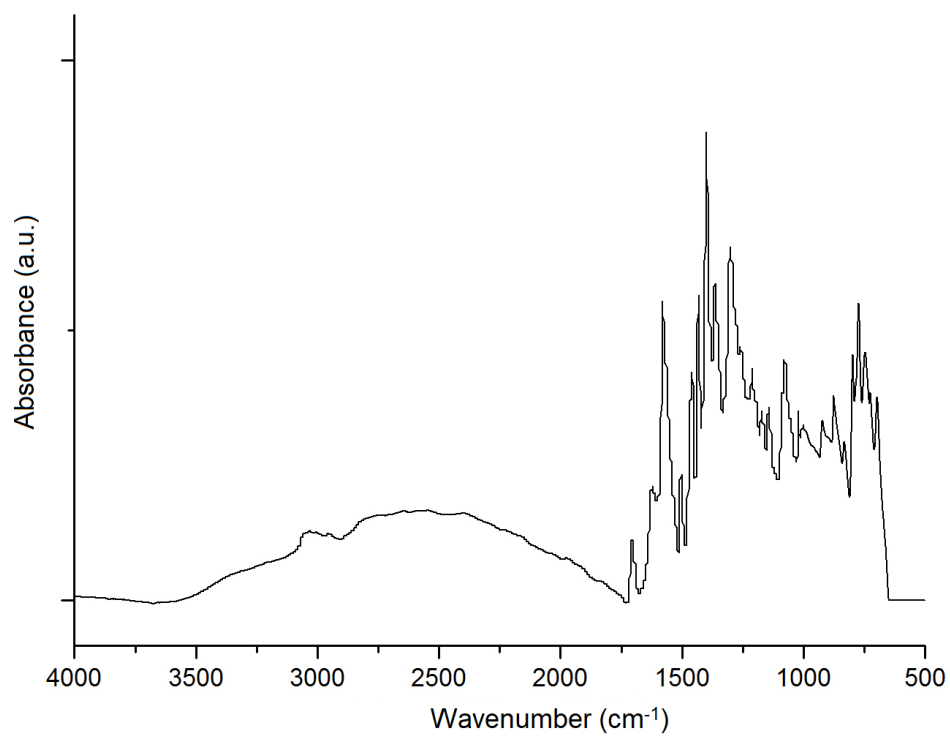

**Figure S11.** ATR-FTIR spectrum of BEA salt **11**

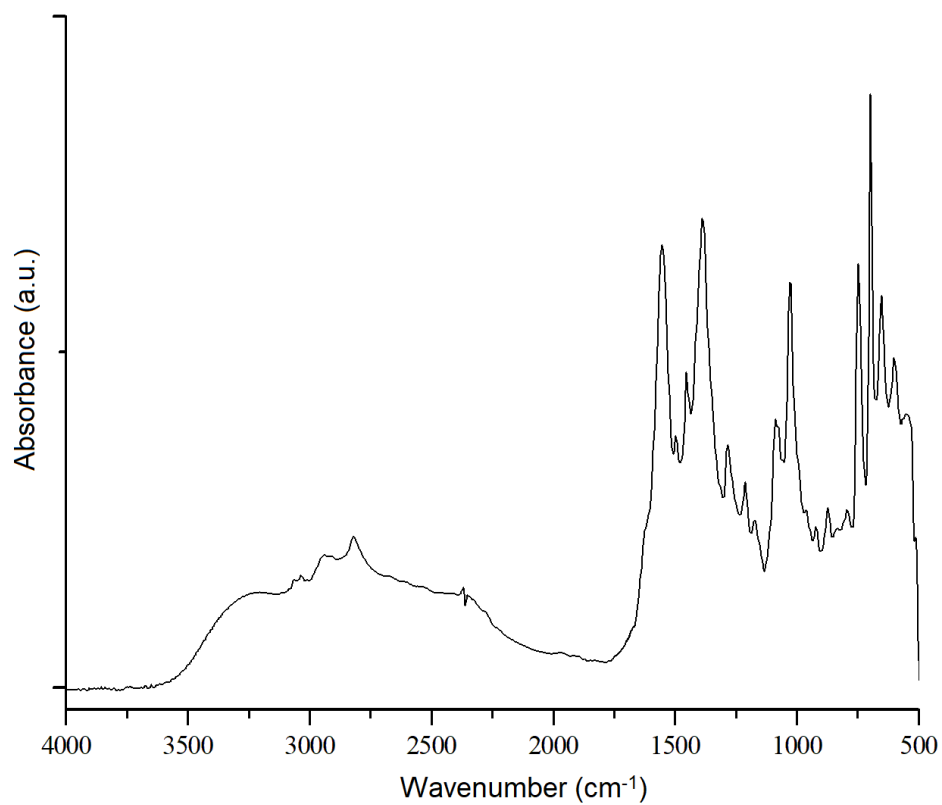

**Figure S12.** ATR-FTIR spectrum of BEA salt **12**

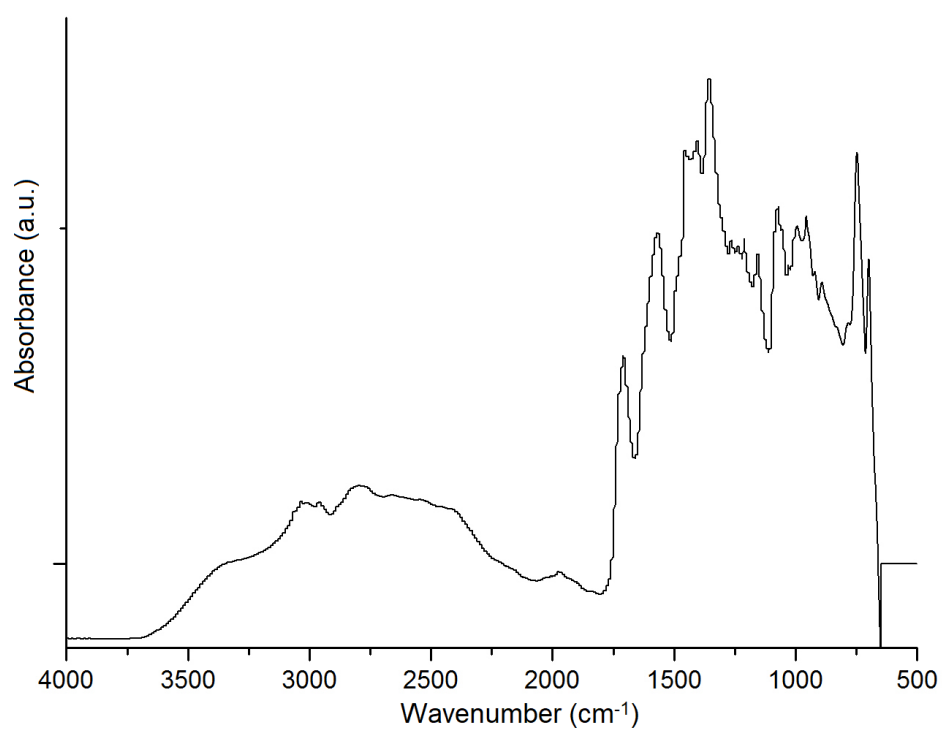

**Figure S13.** ATR-FTIR spectrum of BEA salt **13**

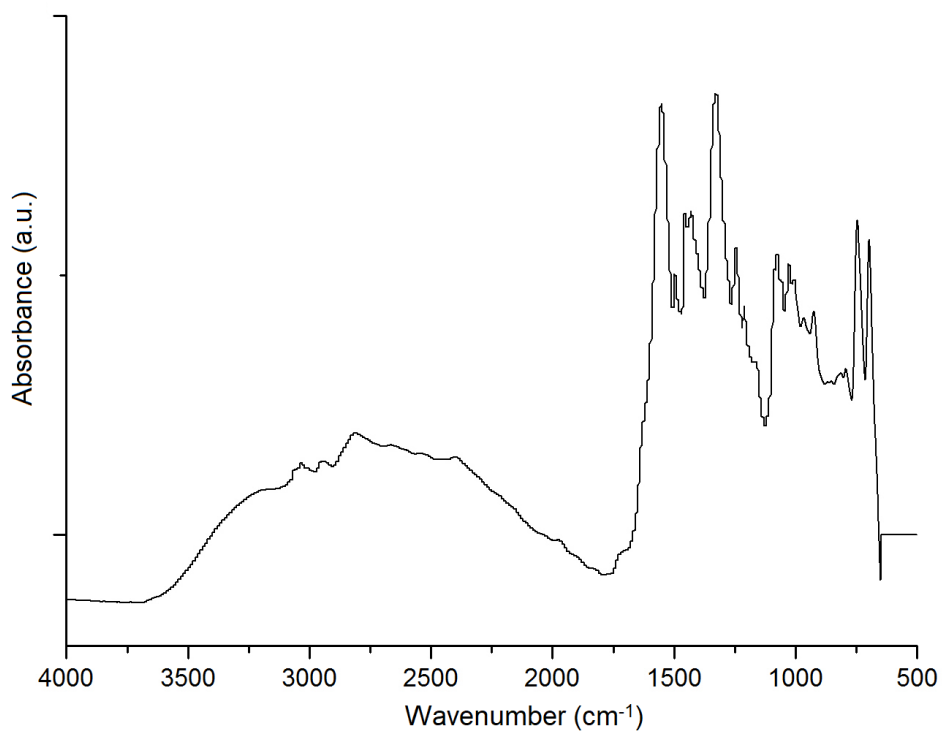

**Figure S14.** ATR-FTIR spectrum of BEA salt **14**



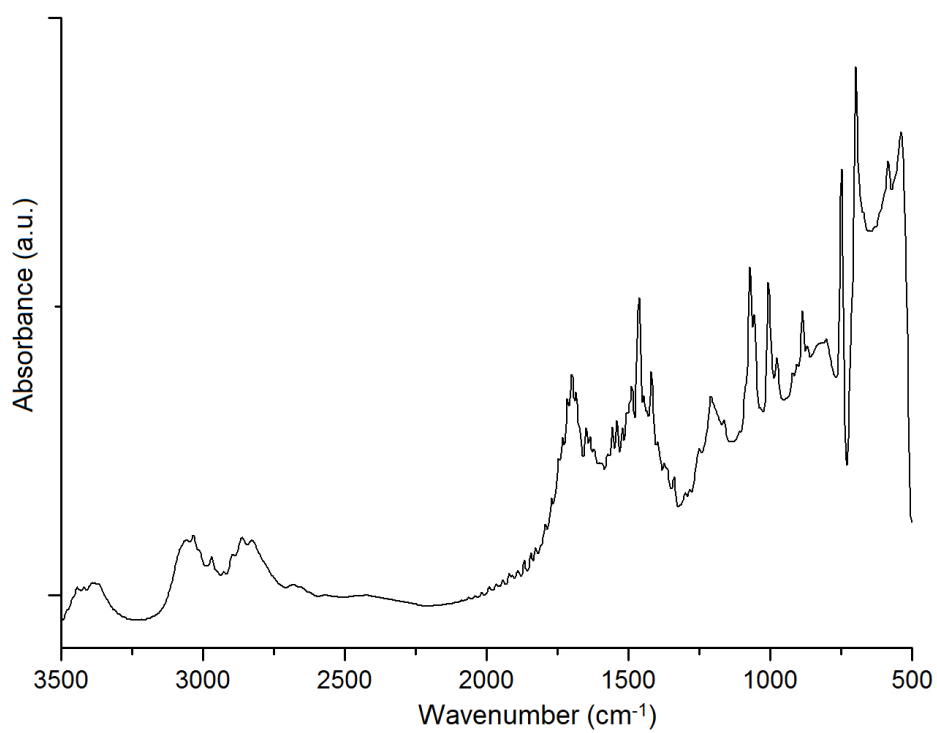

**Figure S15.** ATR-FTIR spectrum of BEA salt **15**

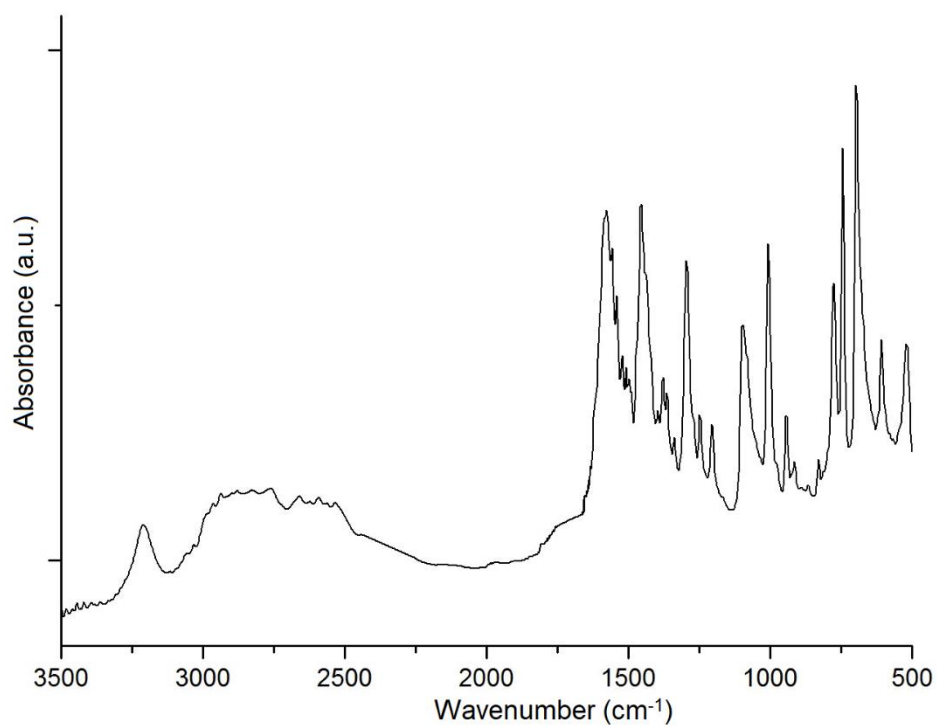

**Figure S16.** ATR-FTIR spectrum of BEA salt **16**

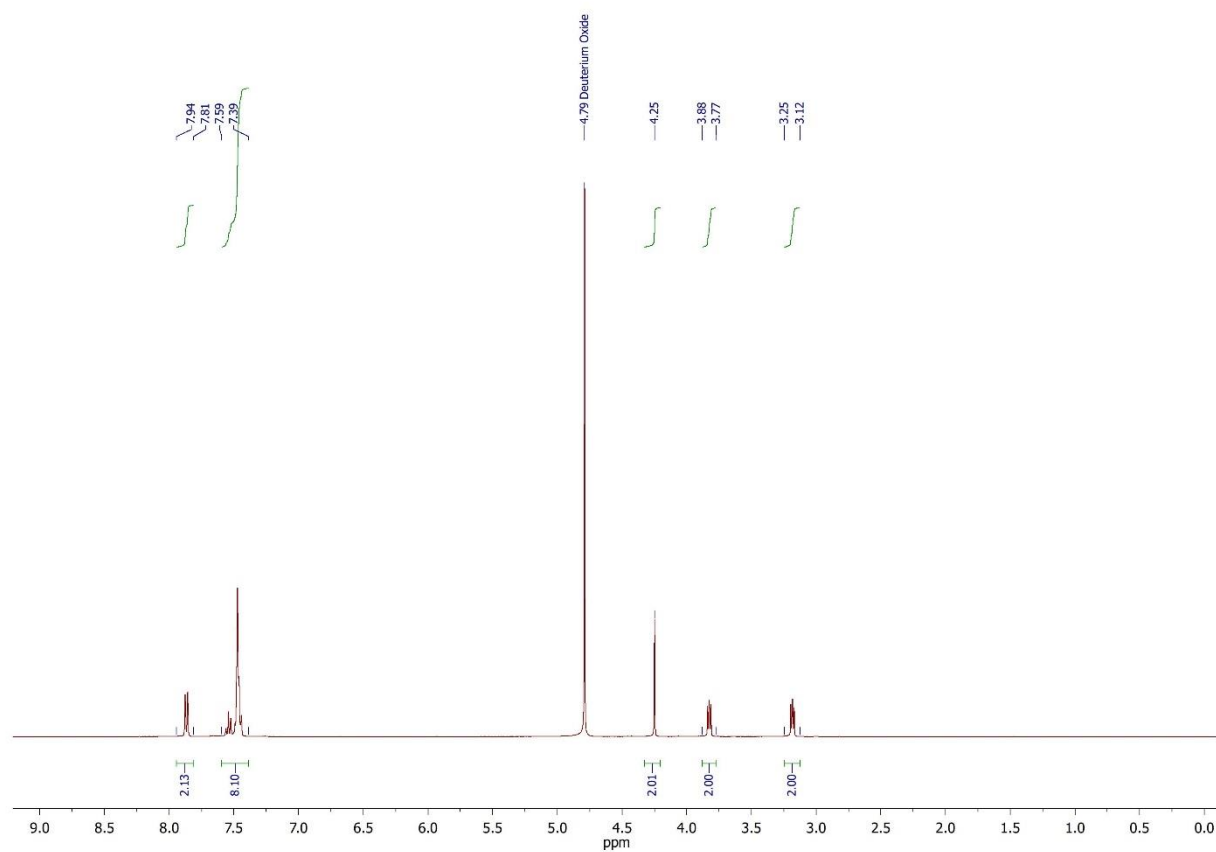

**Figure S17 (a).** <sup>1</sup>H NMR Spectrum of **1** (D<sub>2</sub>O, δ, ppm, *J*, Hz)

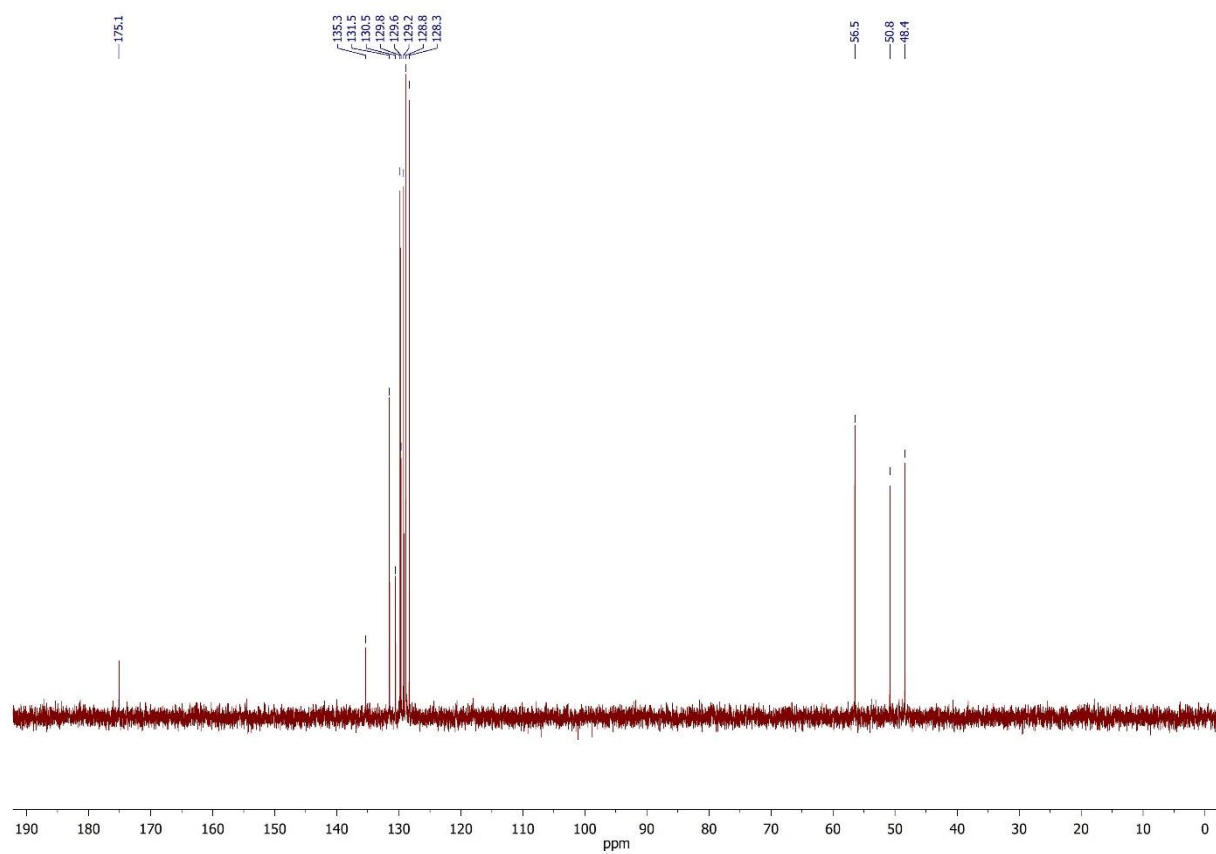

**Figure S17 (b).** <sup>13</sup>C NMR Spectrum of **1** (D<sub>2</sub>O, δ, ppm)

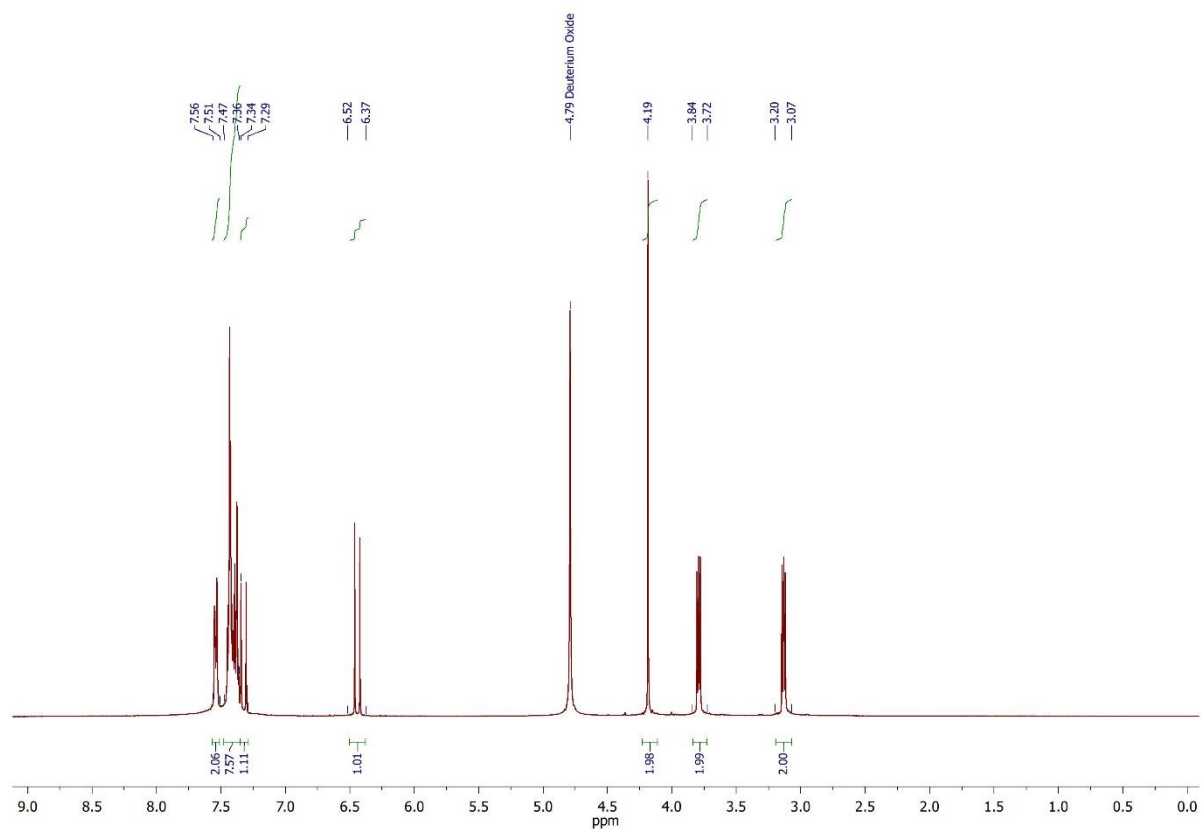

**Figure S18 (a).** <sup>1</sup>H NMR Spectrum of **2** (D<sub>2</sub>O, δ, ppm, *J*, Hz)

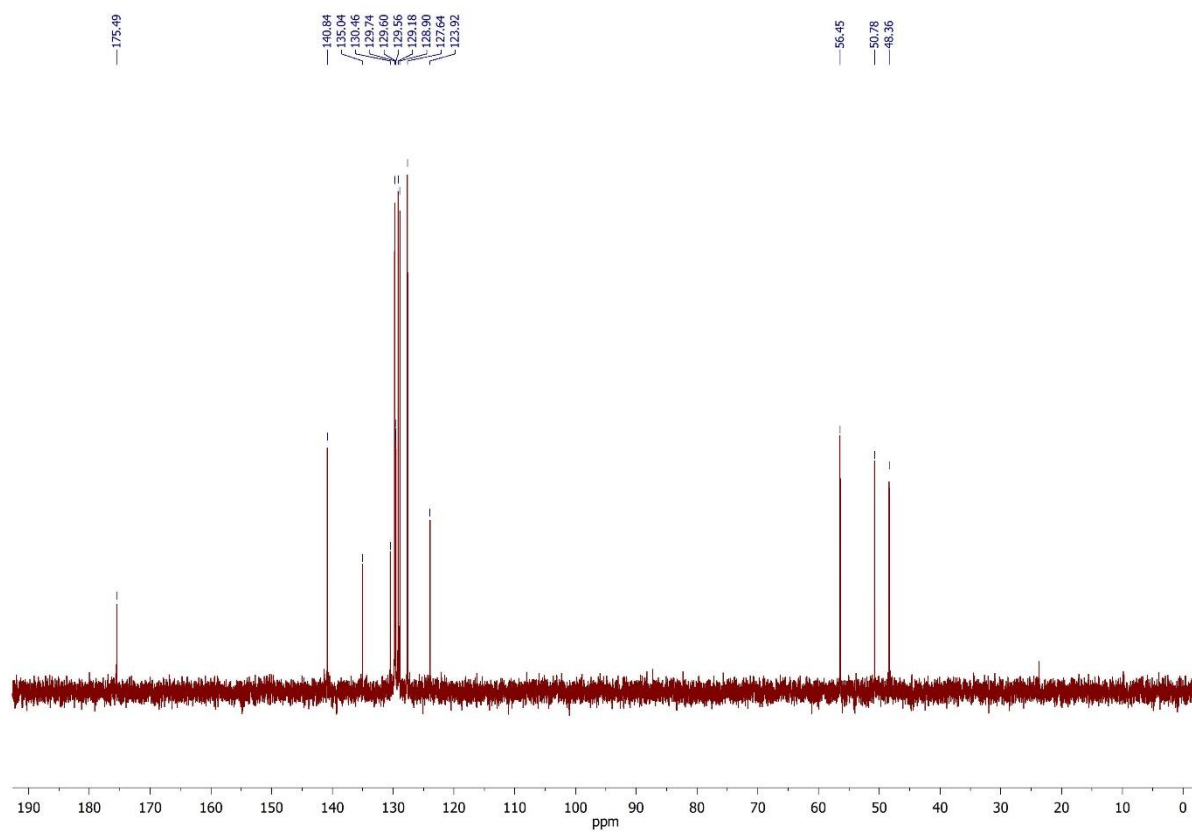

**Figure S18 (b).** <sup>13</sup>C NMR Spectrum of **2** (D<sub>2</sub>O, δ, ppm)

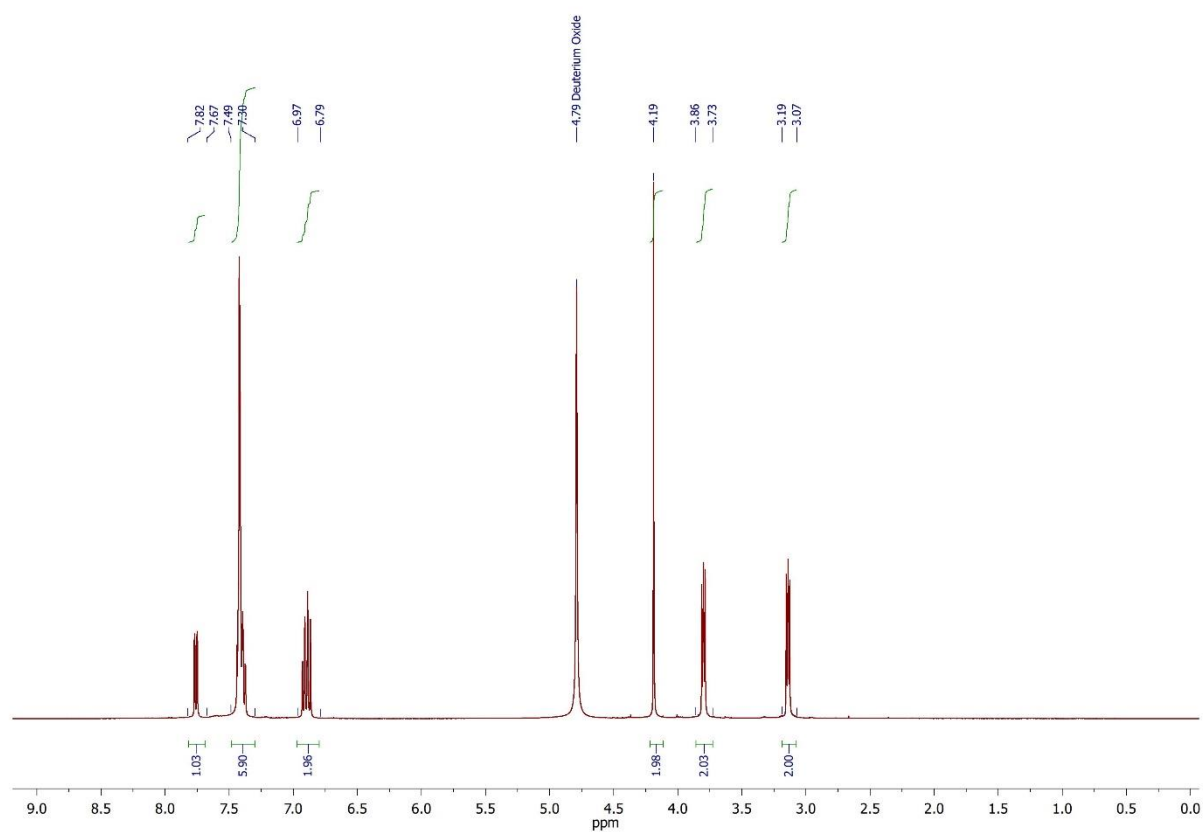

**Figure S19 (a).** <sup>1</sup>H NMR Spectrum of **3** (D<sub>2</sub>O, δ, ppm, *J*, Hz)

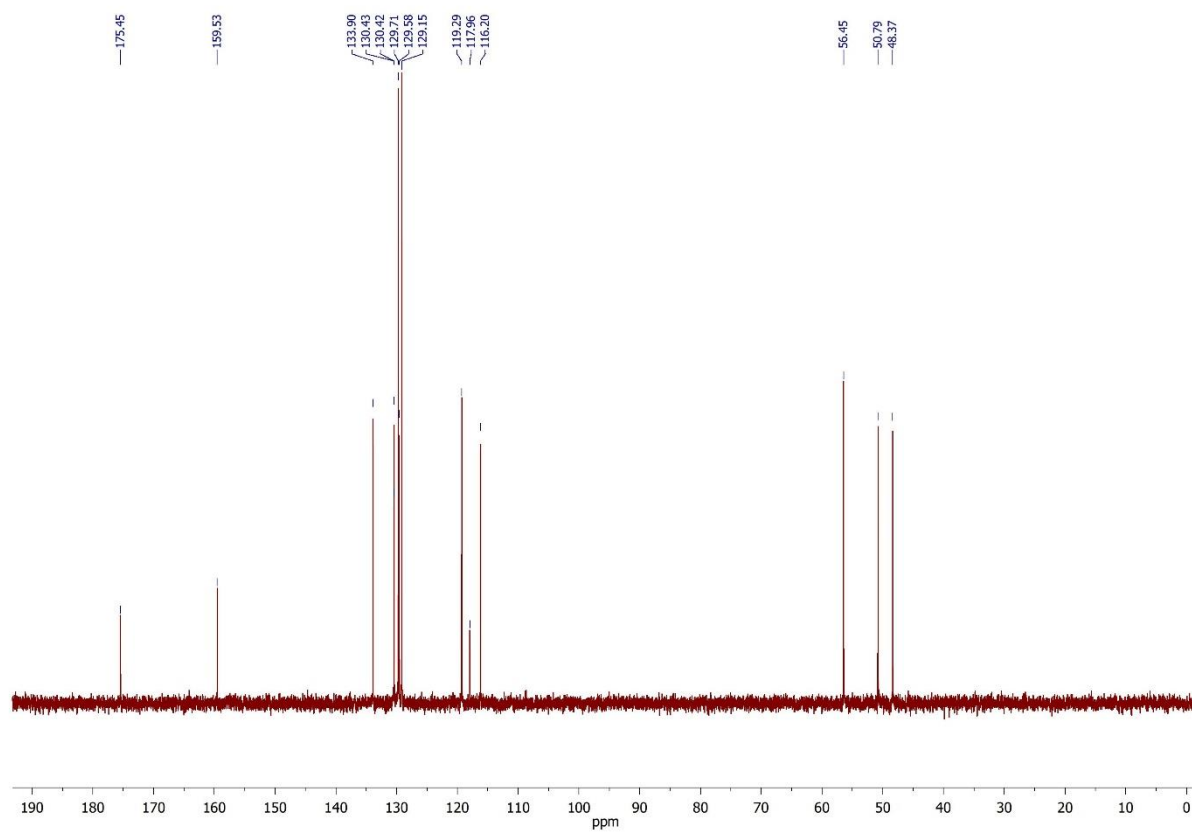

**Figure S19 (b).** <sup>13</sup>C NMR Spectrum of **3** (D<sub>2</sub>O, δ, ppm)

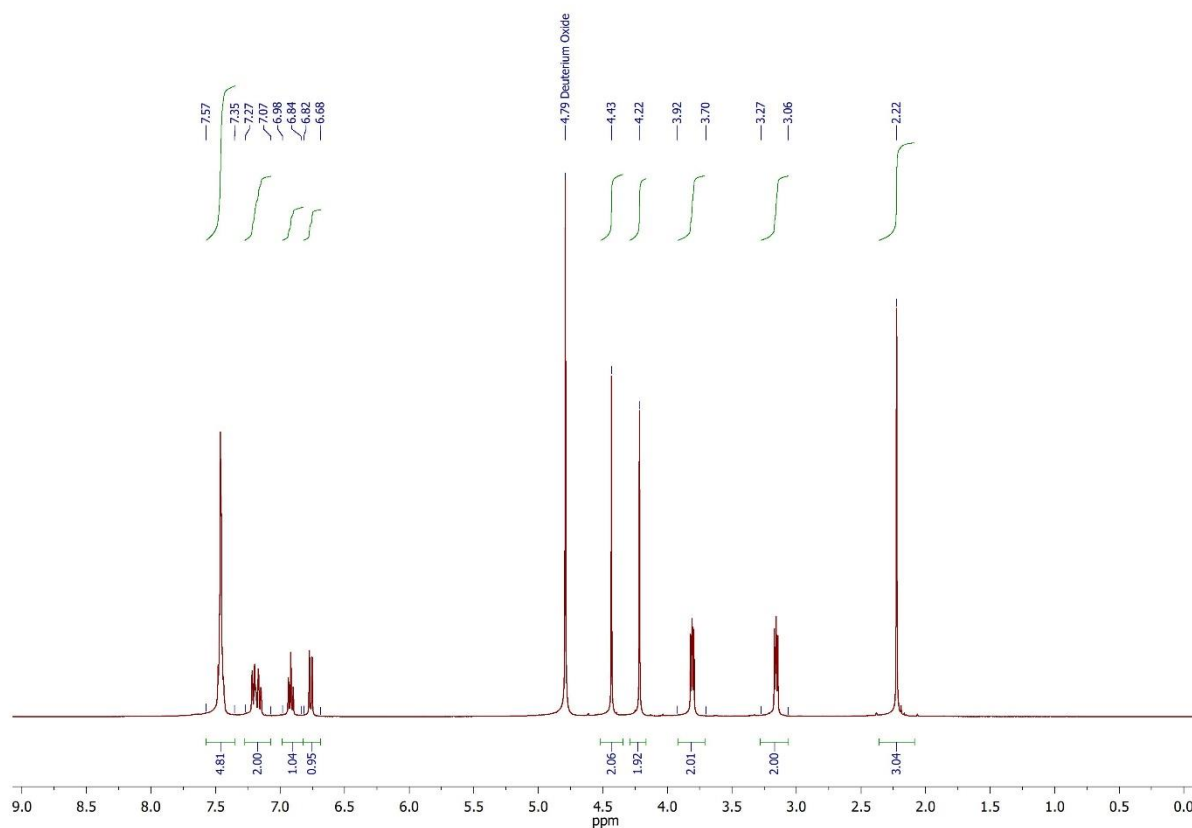

**Figure S20 (a).** <sup>1</sup>H NMR Spectrum of **5** (D<sub>2</sub>O, δ, ppm, *J*, Hz)

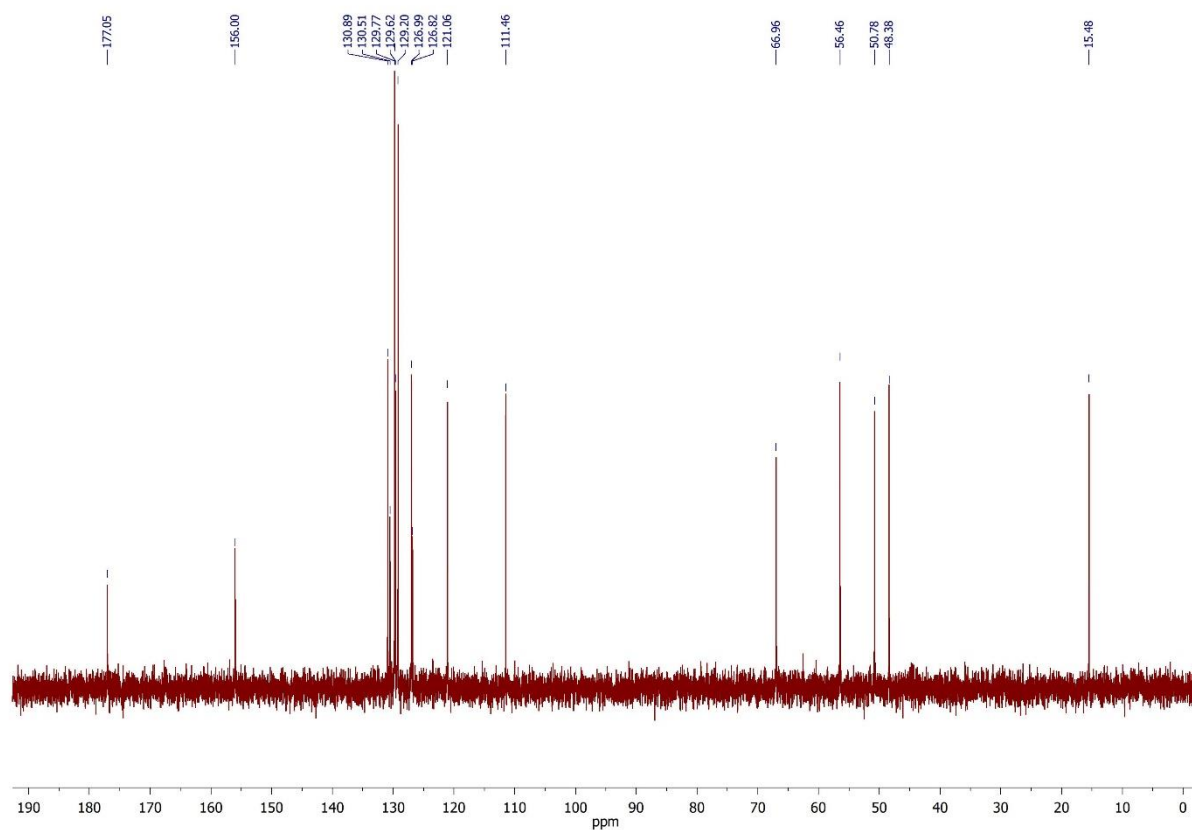

**Figure S20 (b).** <sup>13</sup>C NMR Spectrum of **5** (D<sub>2</sub>O, δ, ppm)

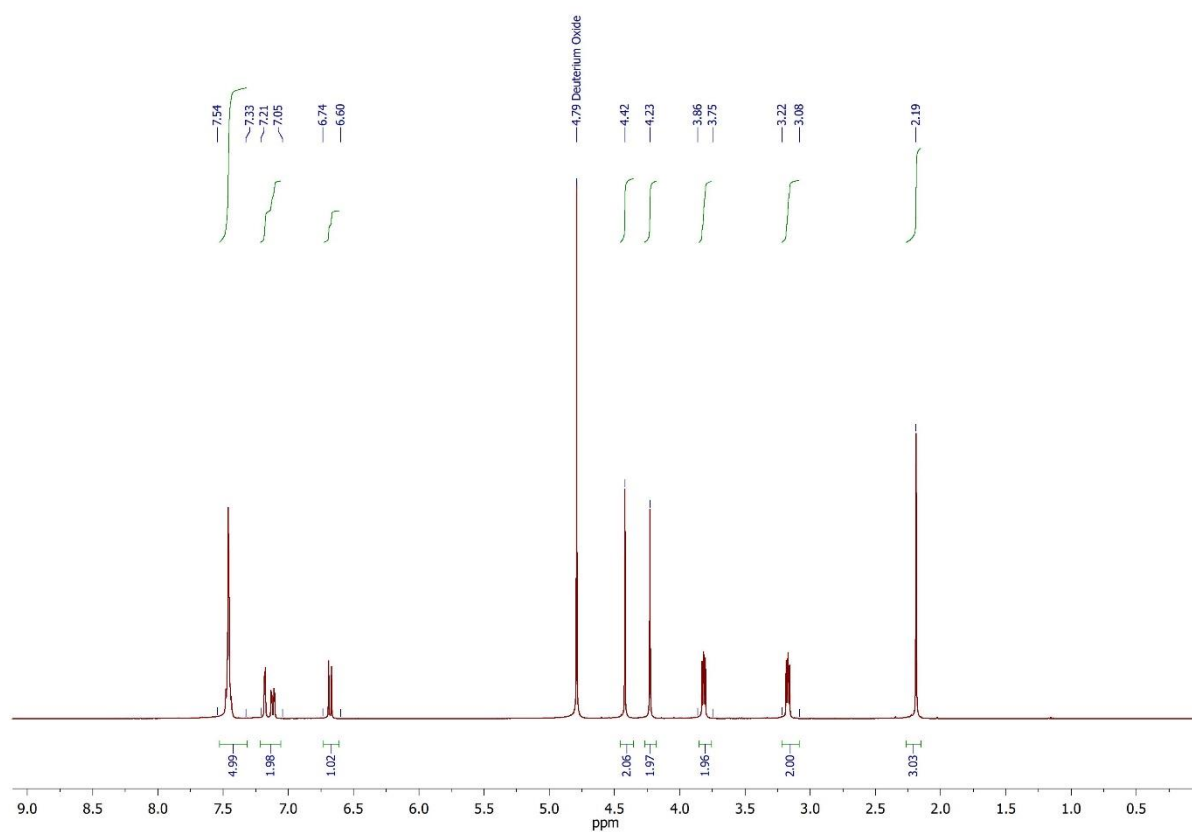

**Figure S21 (a).** <sup>1</sup>H NMR Spectrum of **6** (D<sub>2</sub>O, δ, ppm, *J*, Hz)

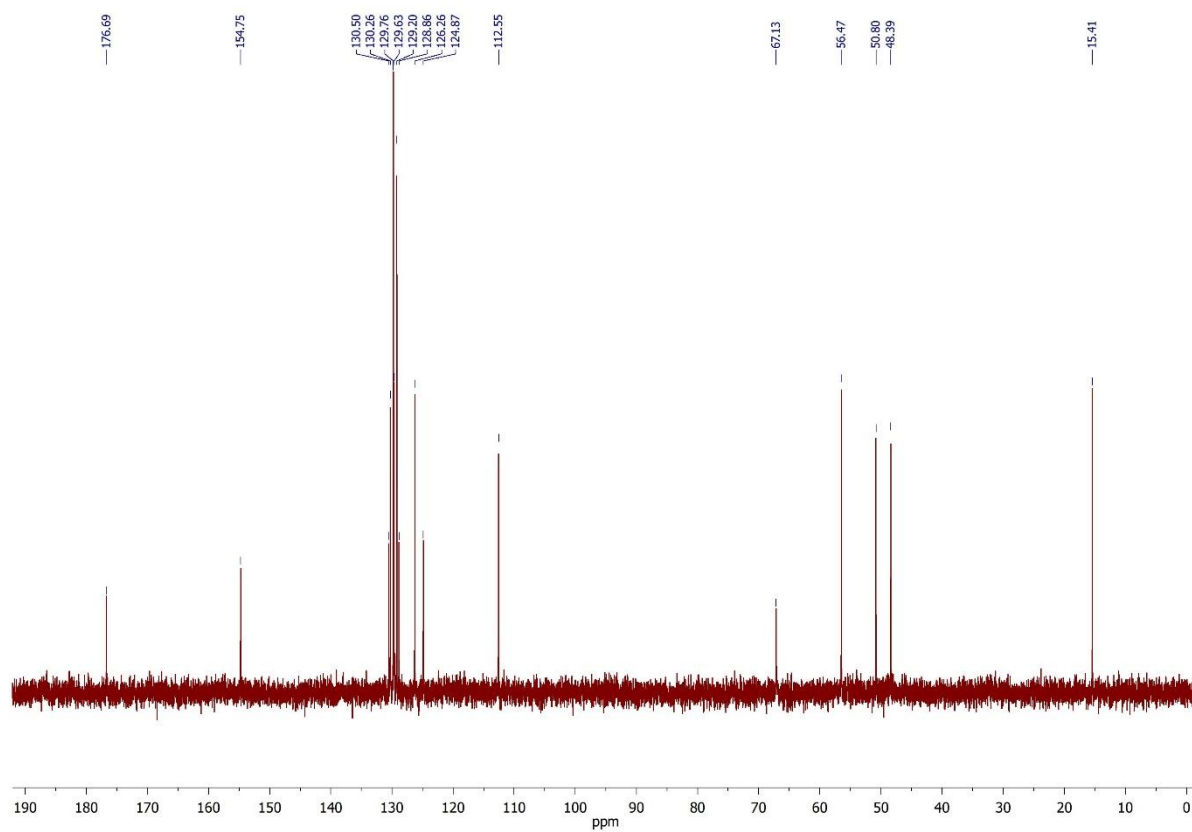

**Figure S21 (b).** <sup>13</sup>C NMR Spectrum of **6** (D<sub>2</sub>O, δ, ppm)

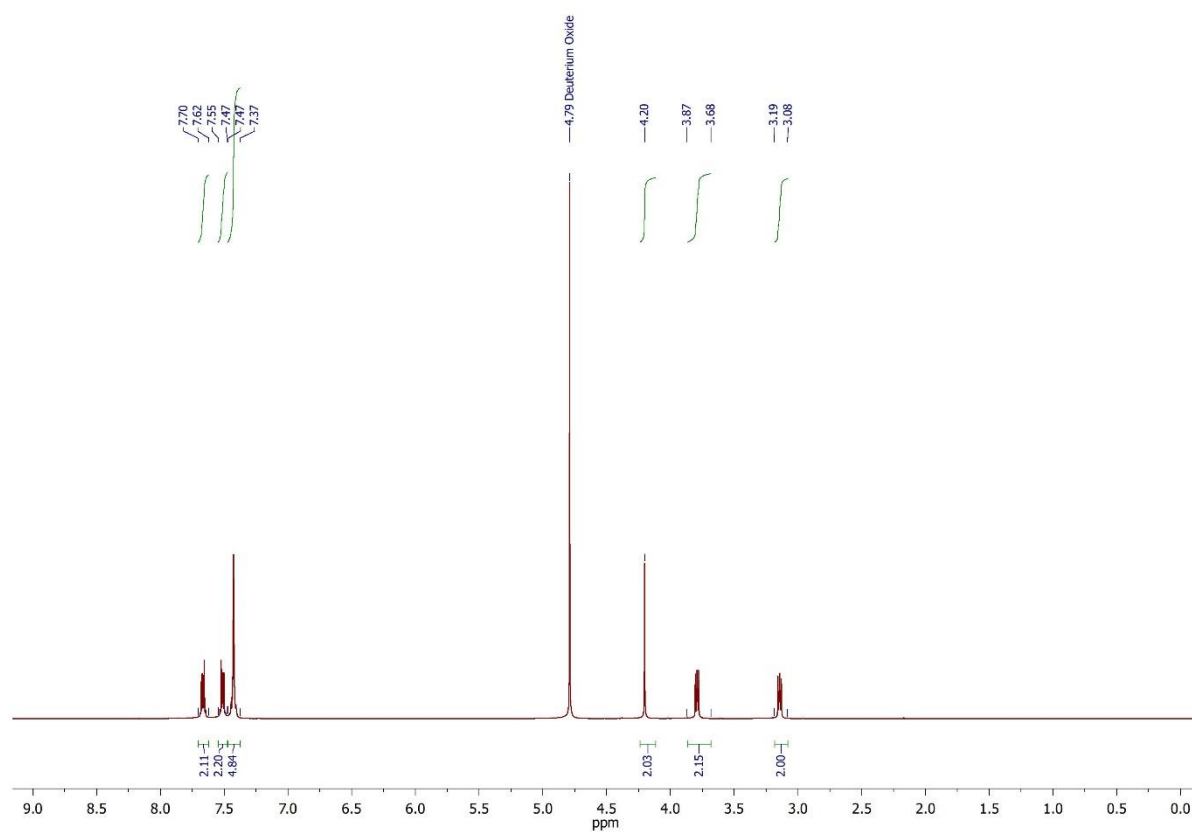

**Figure S22 (a).** <sup>1</sup>H NMR Spectrum of **7** (D<sub>2</sub>O, δ, ppm, *J*, Hz)

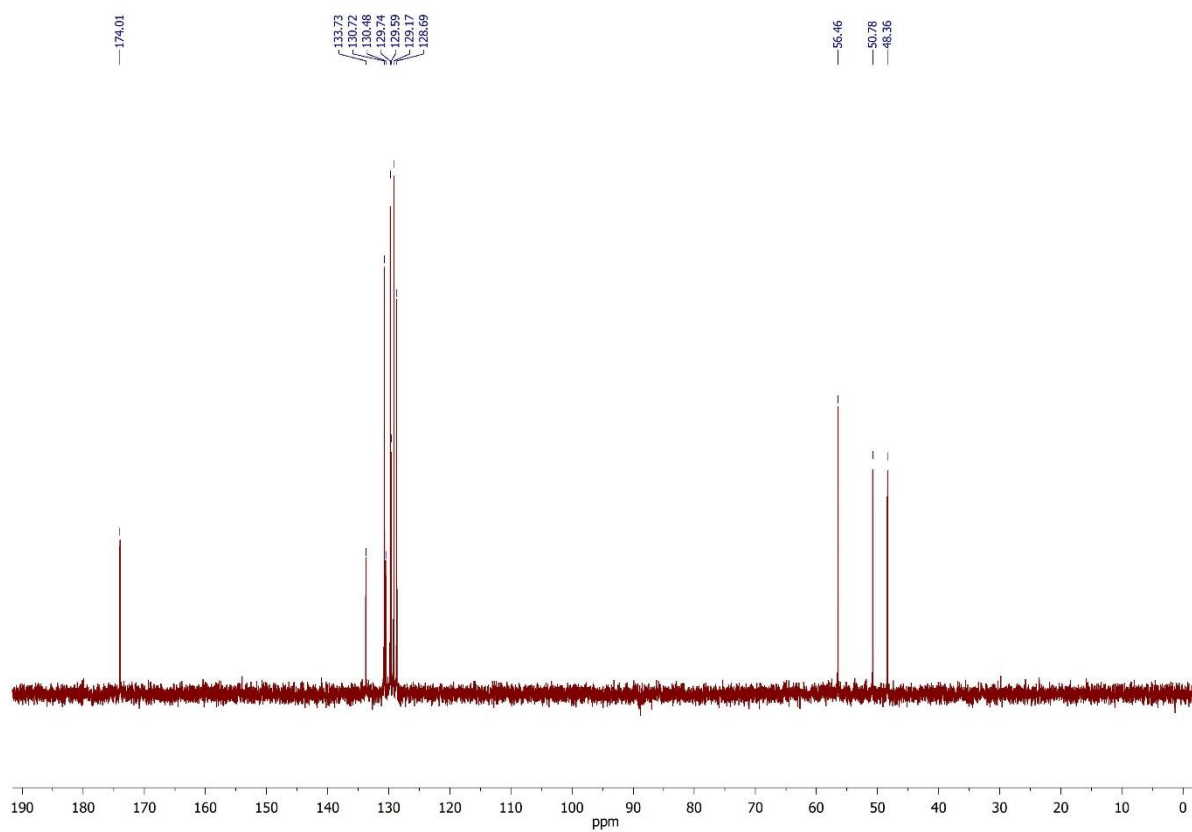

**Figure S22 (b).** <sup>13</sup>C NMR Spectrum of **7** (D<sub>2</sub>O, δ, ppm)

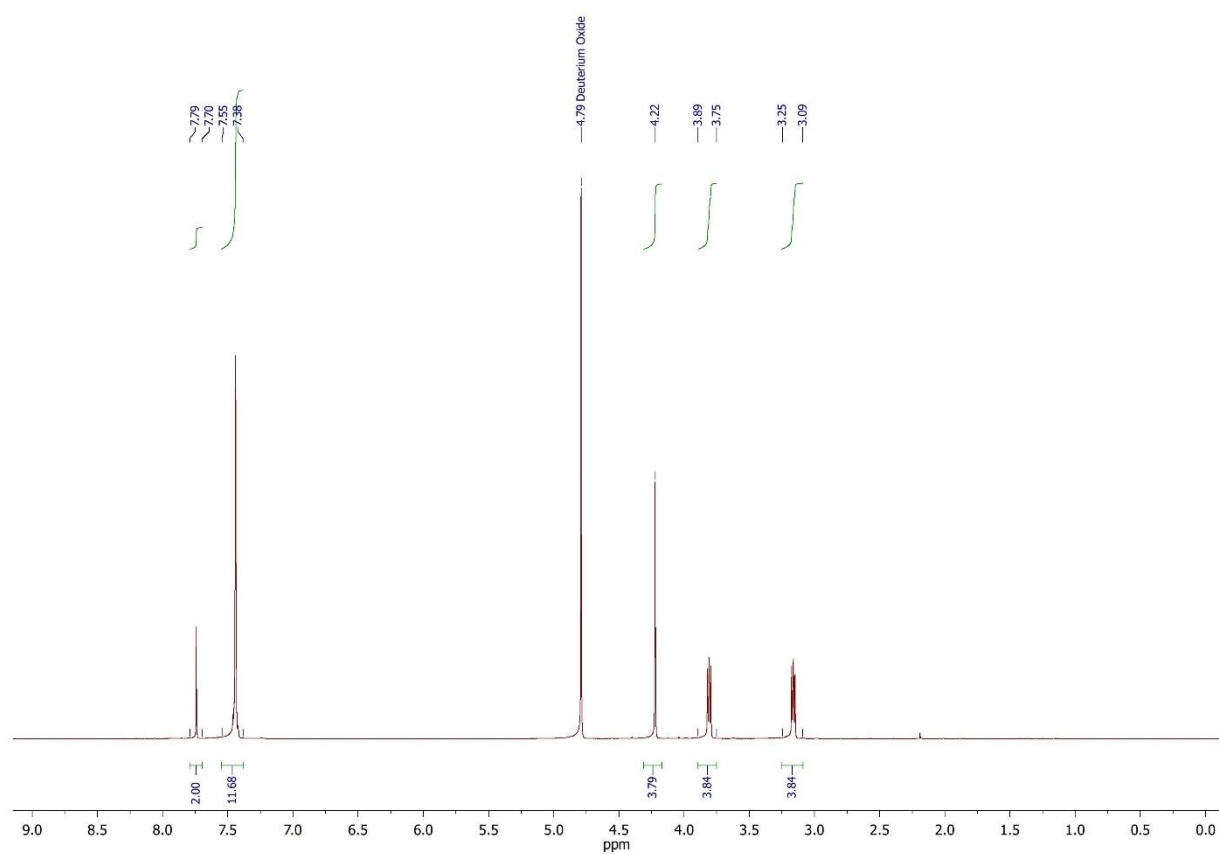

**Figure S23 (a).** <sup>1</sup>H NMR Spectrum of **8** (D<sub>2</sub>O, δ, ppm, *J*, Hz)

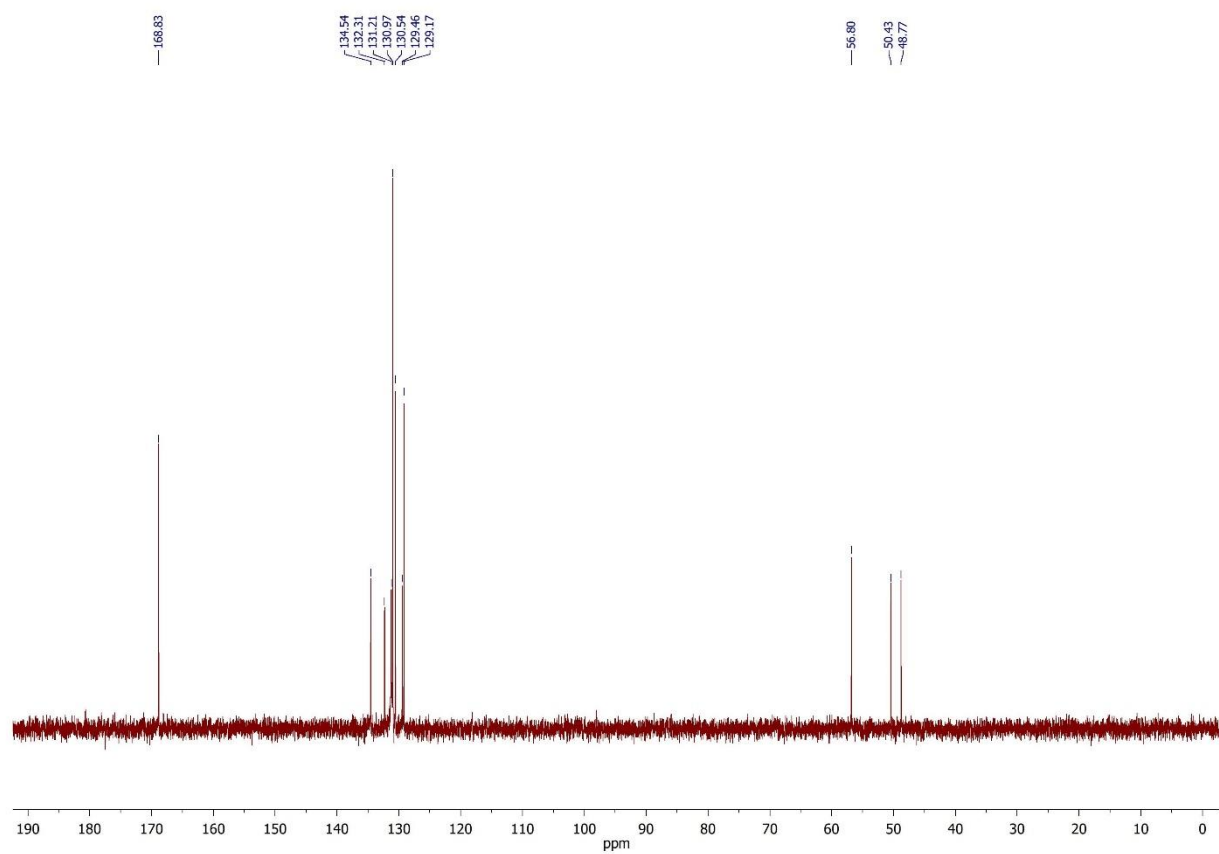

**Figure S23 (b).** <sup>13</sup>C NMR Spectrum of **8** (D<sub>2</sub>O, δ, ppm)



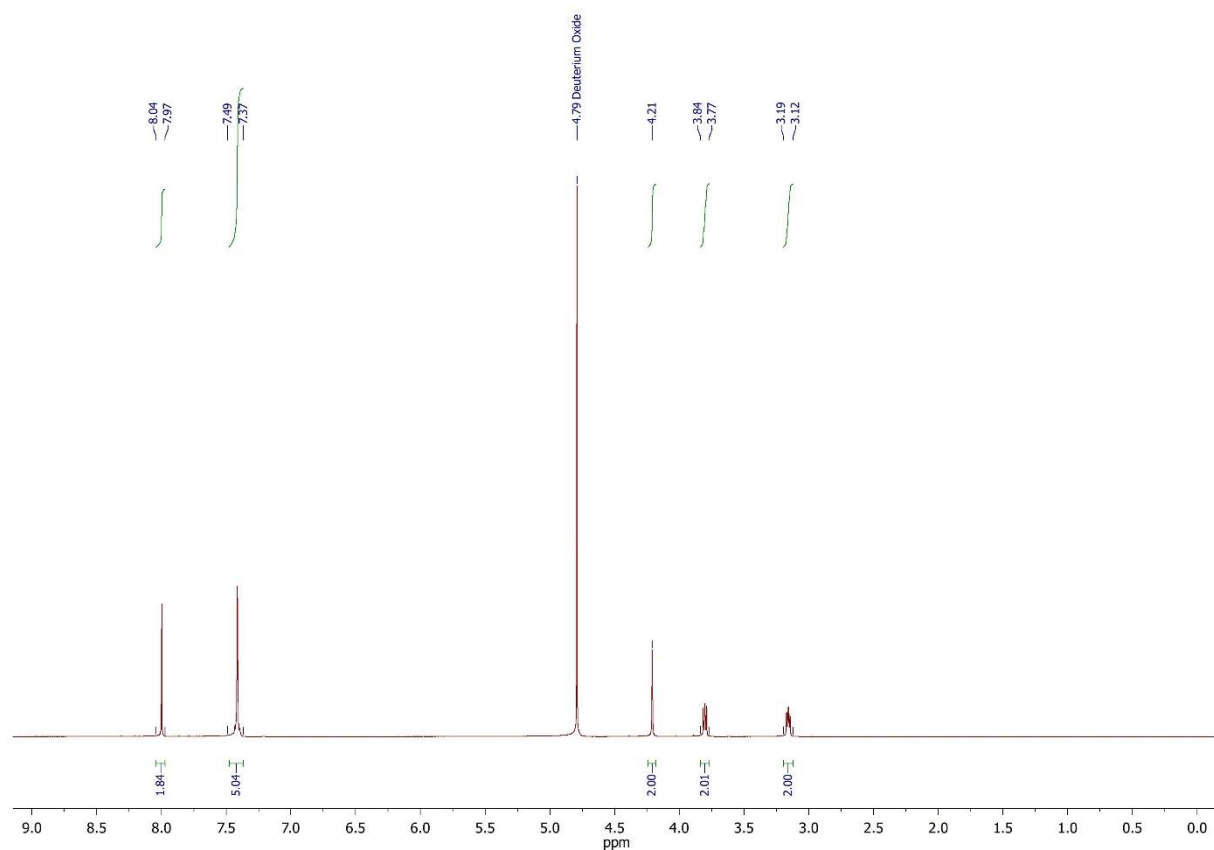

**Figure S24 (a).** <sup>1</sup>H NMR Spectrum of **9** (D<sub>2</sub>O,  $\delta$ , ppm, *J*, Hz)

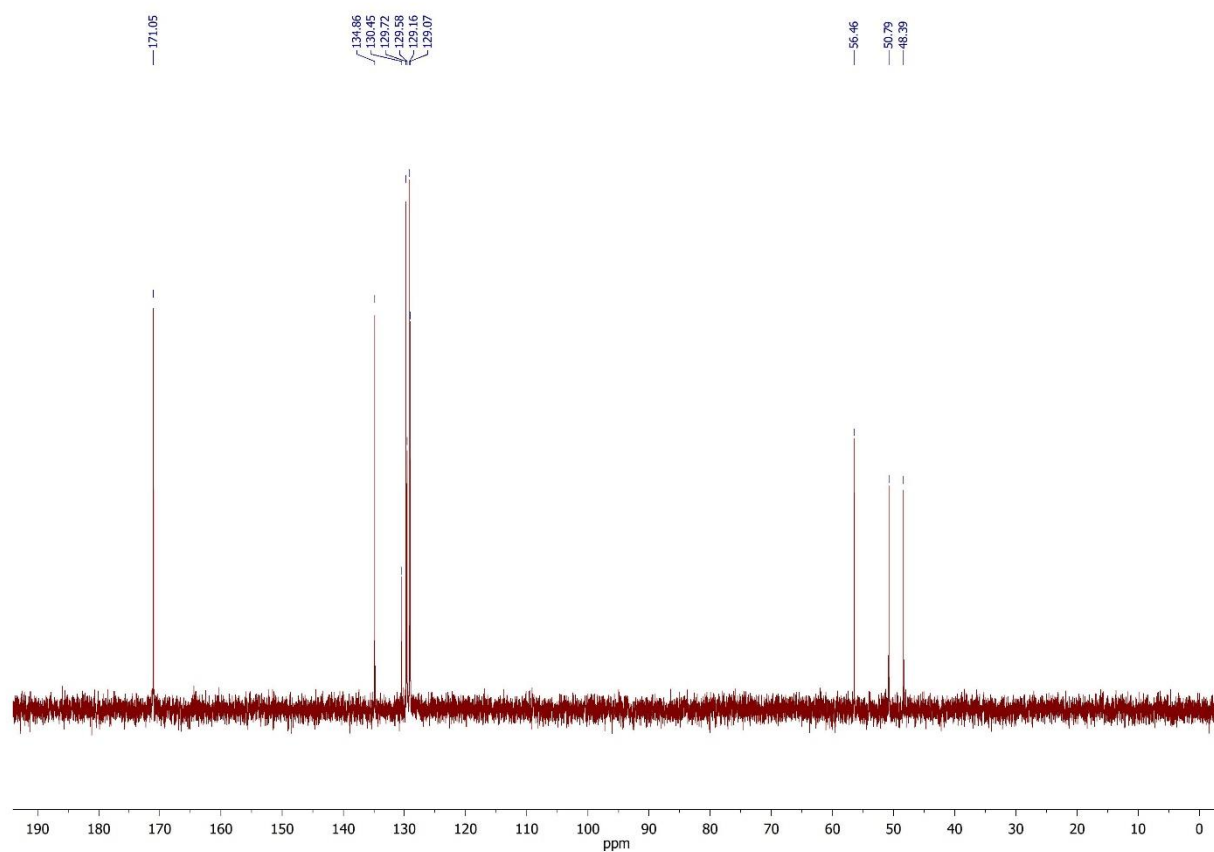

**Figure S24 (b).** <sup>13</sup>C NMR Spectrum of **9** (D<sub>2</sub>O,  $\delta$ , ppm)

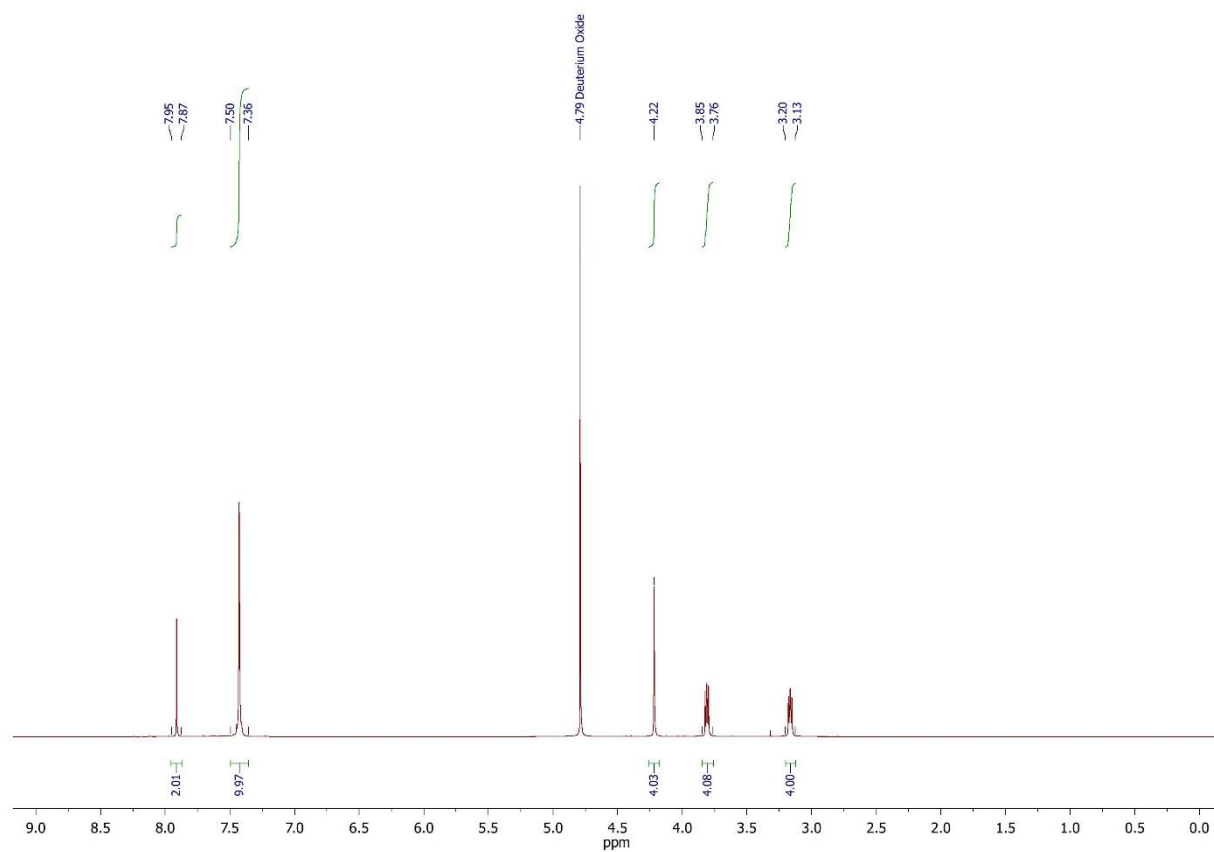

**Figure S25 (a).** <sup>1</sup>H NMR Spectrum of **10** (D<sub>2</sub>O,  $\delta$ , ppm,  $J$ , Hz)

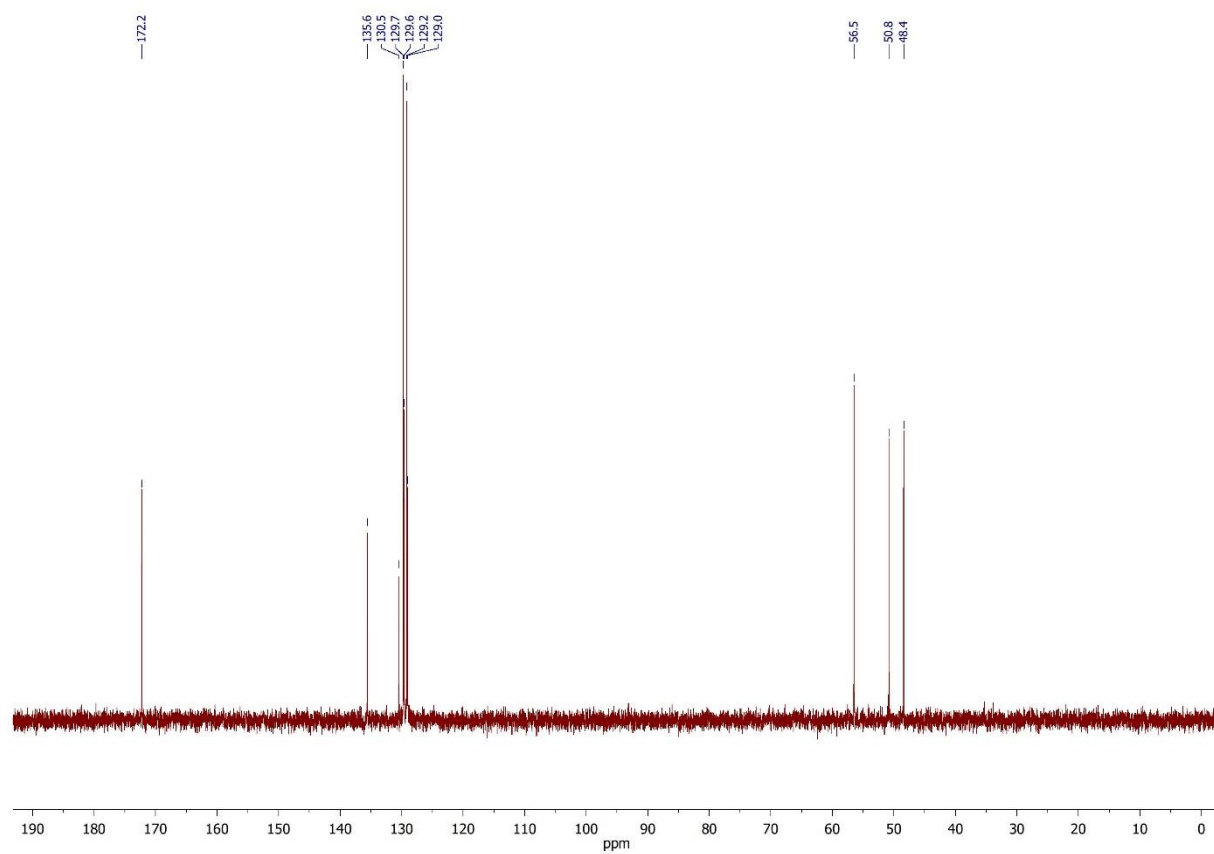

**Figure S25 (b).** <sup>13</sup>C NMR Spectrum of **10** (D<sub>2</sub>O,  $\delta$ , ppm)

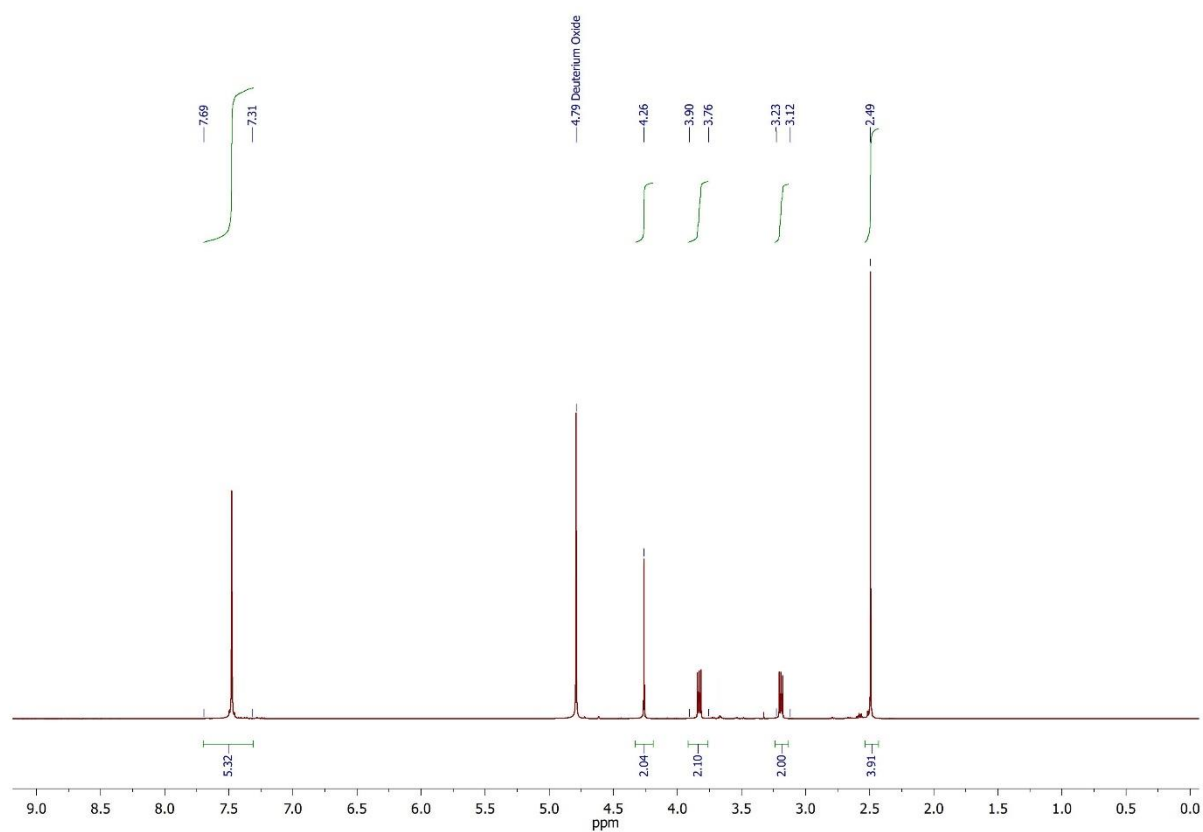

**Figure S26 (a).** <sup>1</sup>H NMR Spectrum of **11** (D<sub>2</sub>O, δ, ppm, *J*, Hz)

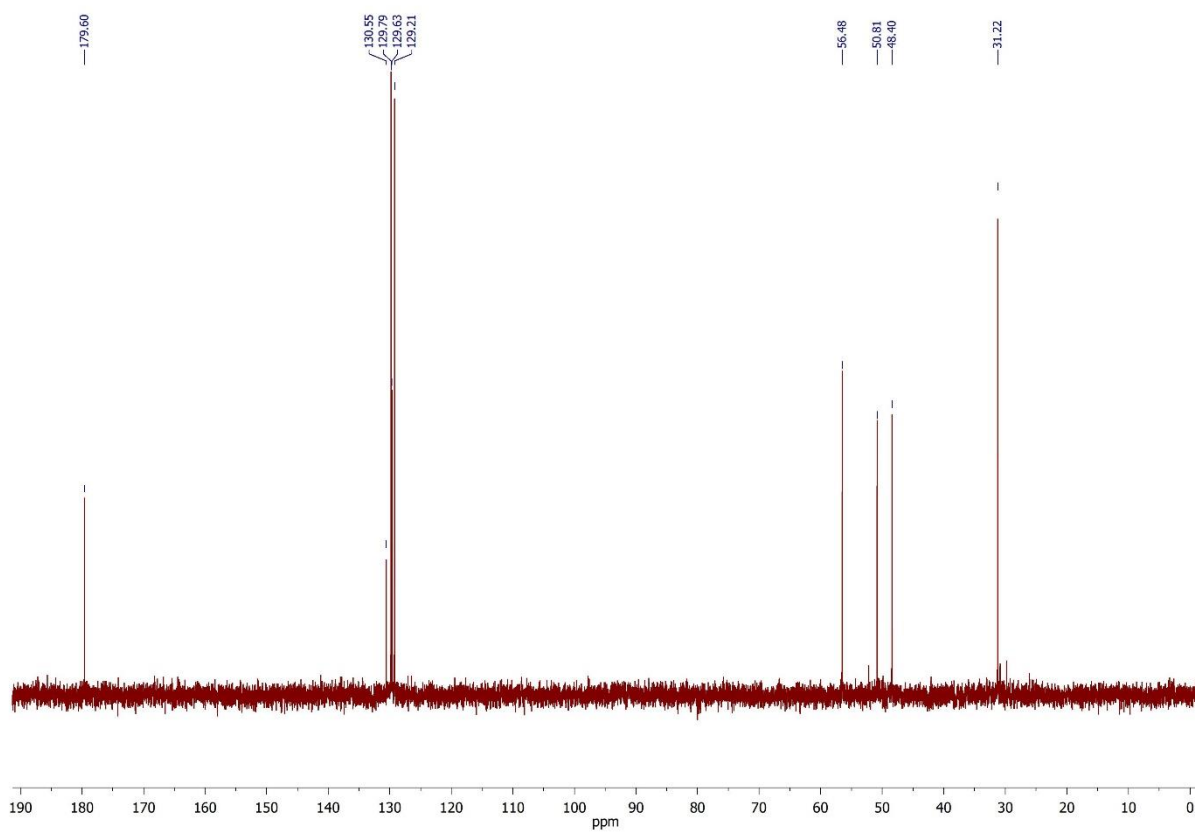

**Figure S26 (b).** <sup>13</sup>C NMR Spectrum of **11** (D<sub>2</sub>O, δ, ppm)

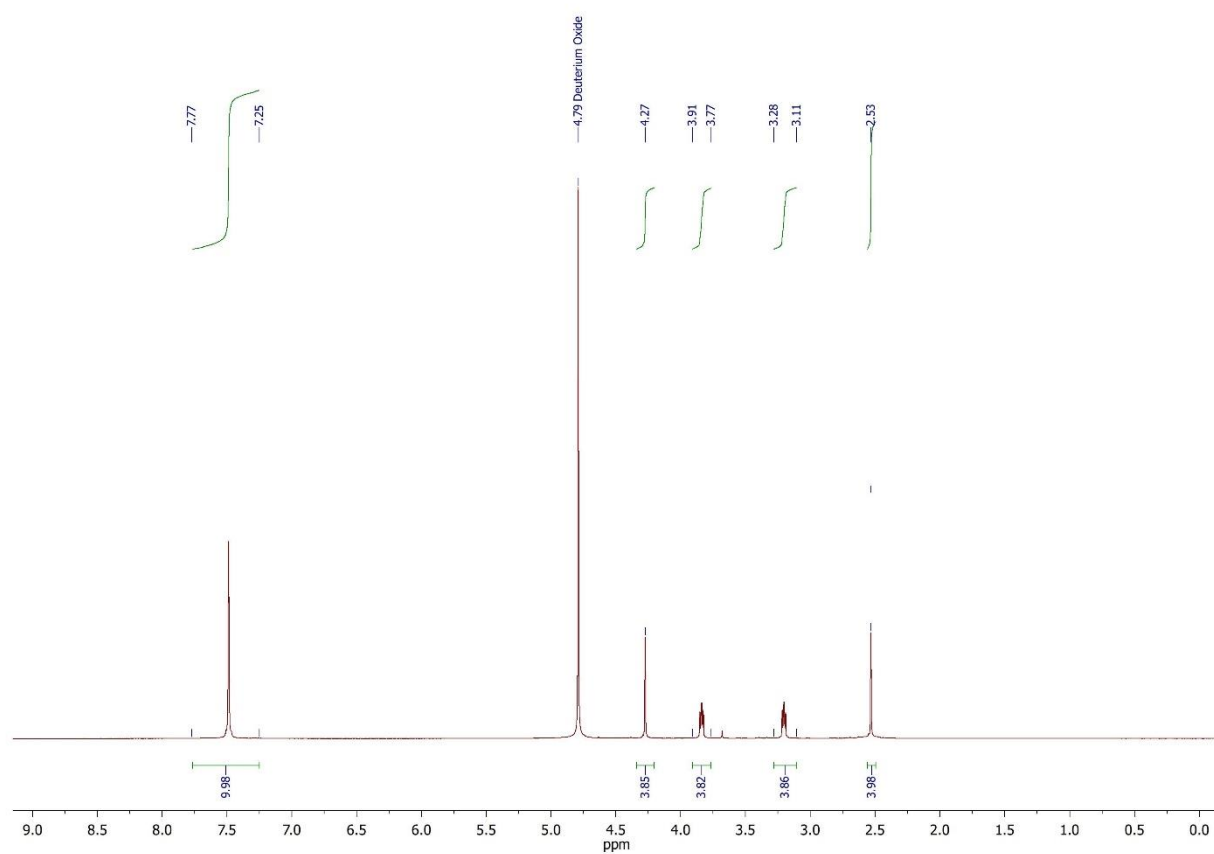

**Figure S27 (a).** <sup>1</sup>H NMR Spectrum of **12** (D<sub>2</sub>O, δ, ppm, *J*, Hz)

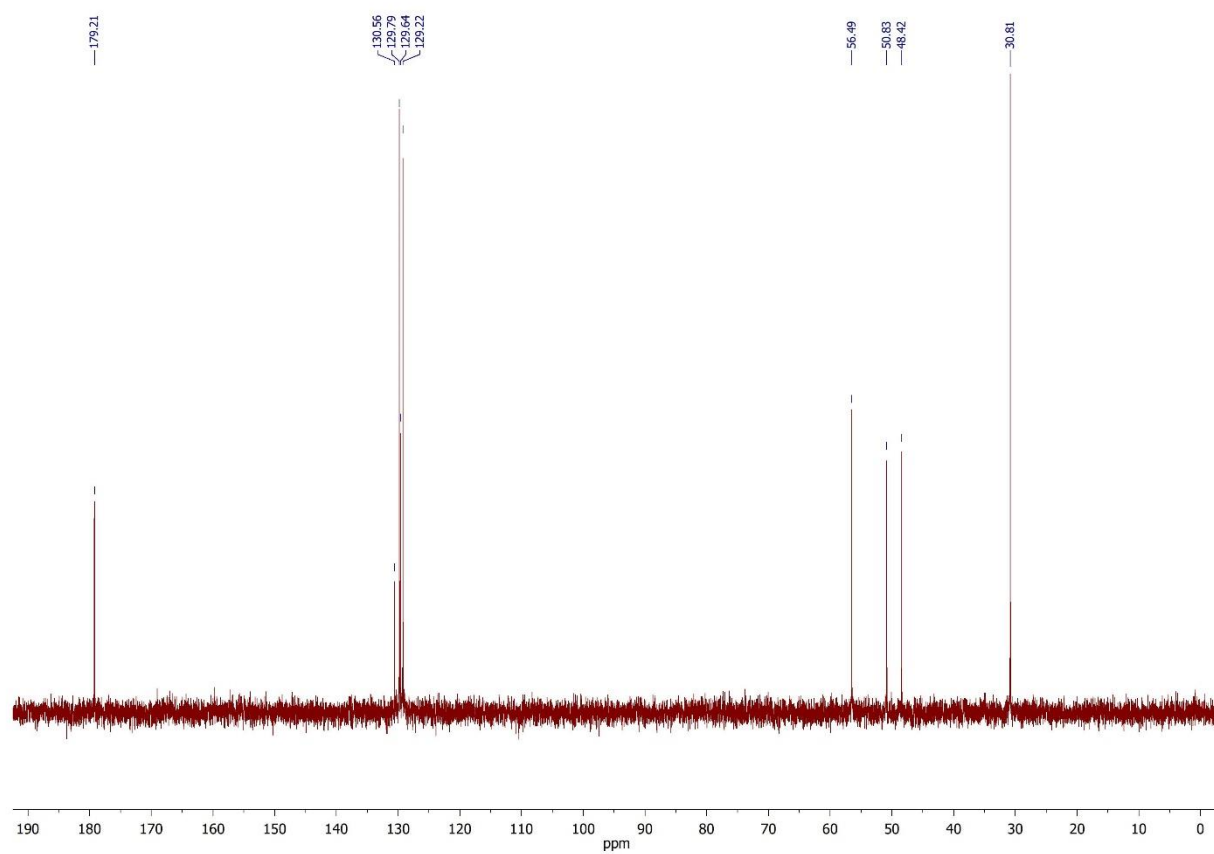

**Figure S27 (b).** <sup>13</sup>C NMR Spectrum of **12** (D<sub>2</sub>O, δ, ppm)

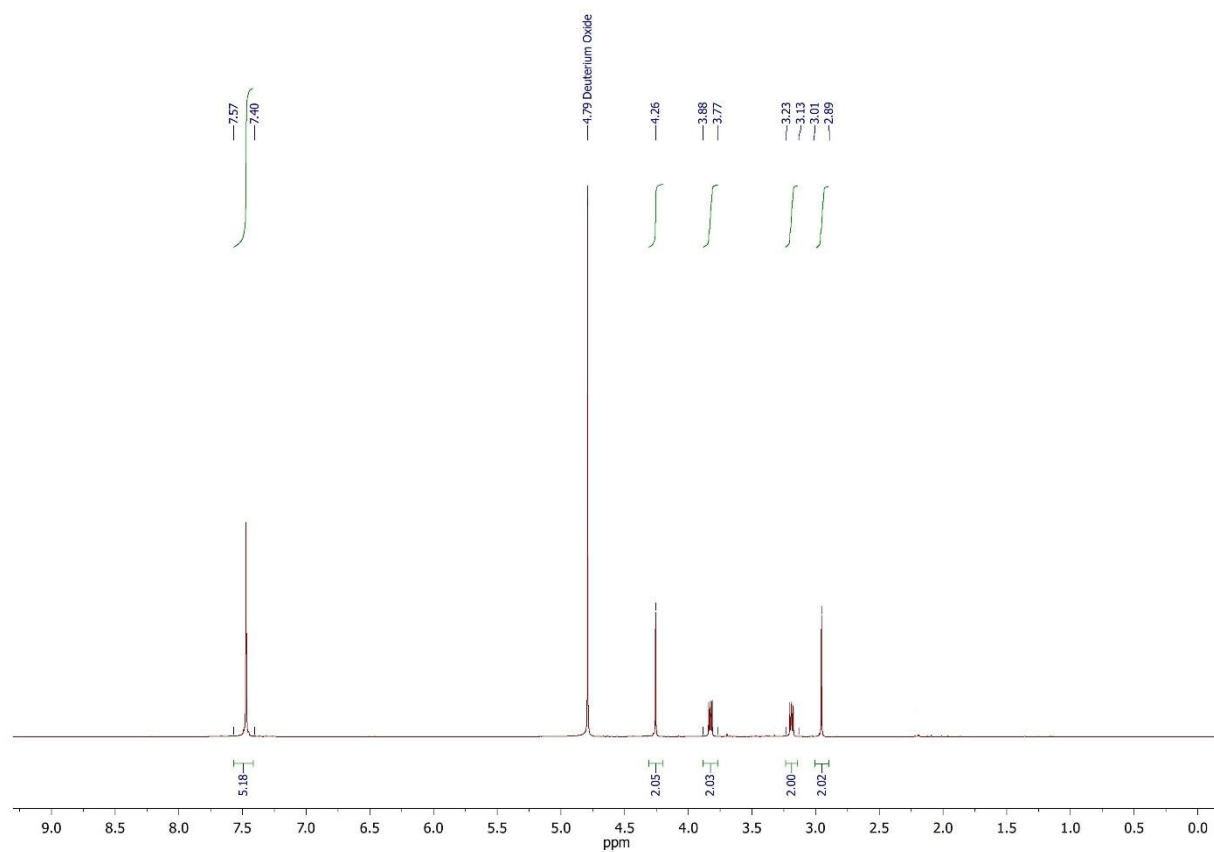

**Figure S28 (a).** <sup>1</sup>H NMR Spectrum of **13** (D<sub>2</sub>O,  $\delta$ , ppm, *J*, Hz)

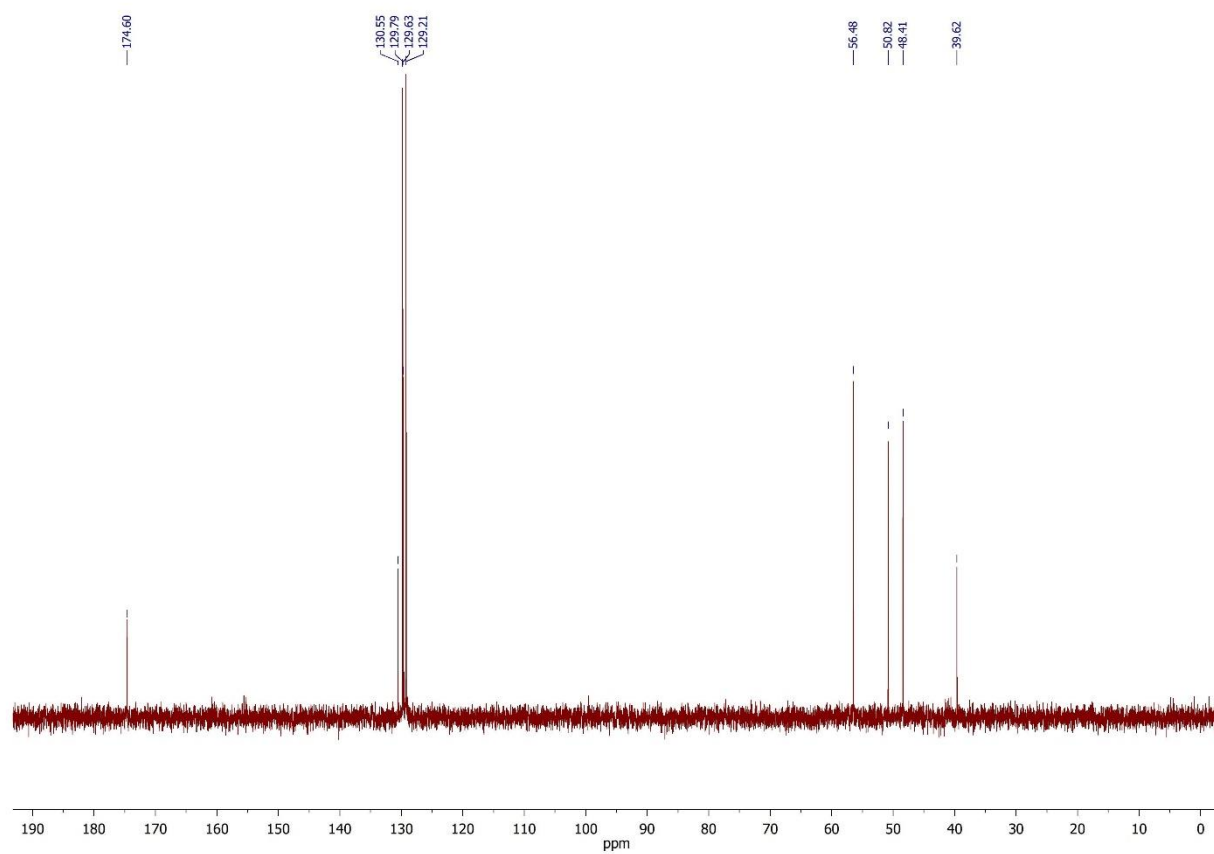

**Figure S28 (b).** <sup>13</sup>C NMR Spectrum of **13** (D<sub>2</sub>O,  $\delta$ , ppm)

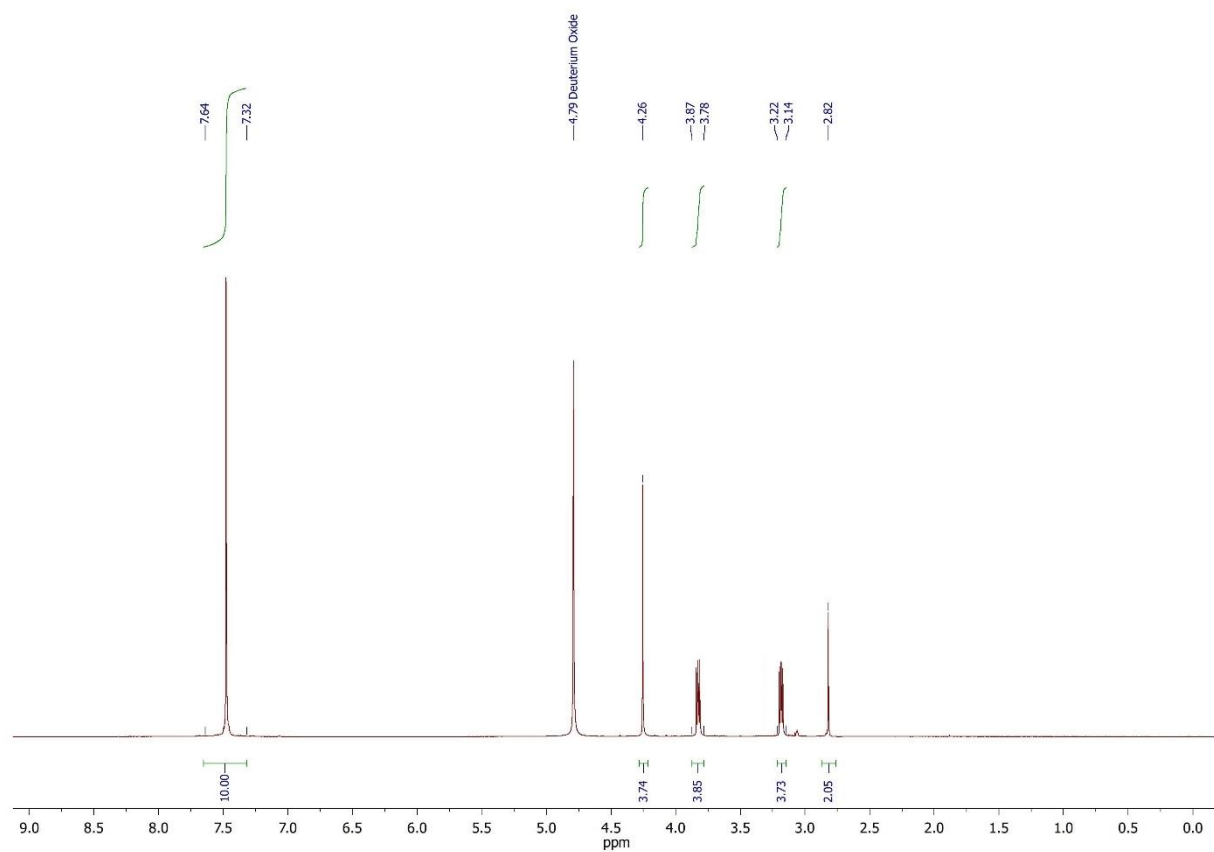

**Figure S29 (a).** <sup>1</sup>H NMR Spectrum of **14** (D<sub>2</sub>O, δ, ppm, *J*, Hz)

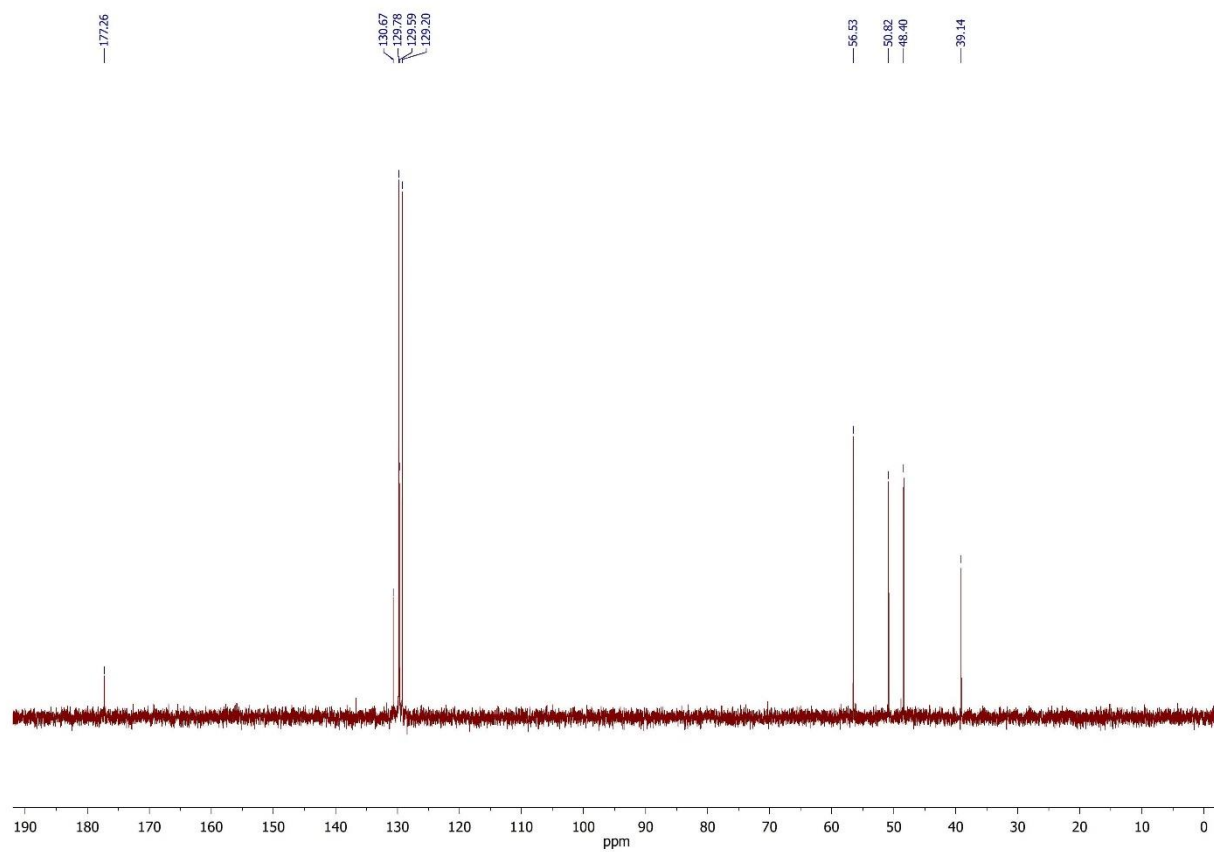

**Figure S29 (b).** <sup>13</sup>C NMR Spectrum of **14** (D<sub>2</sub>O, δ, ppm)

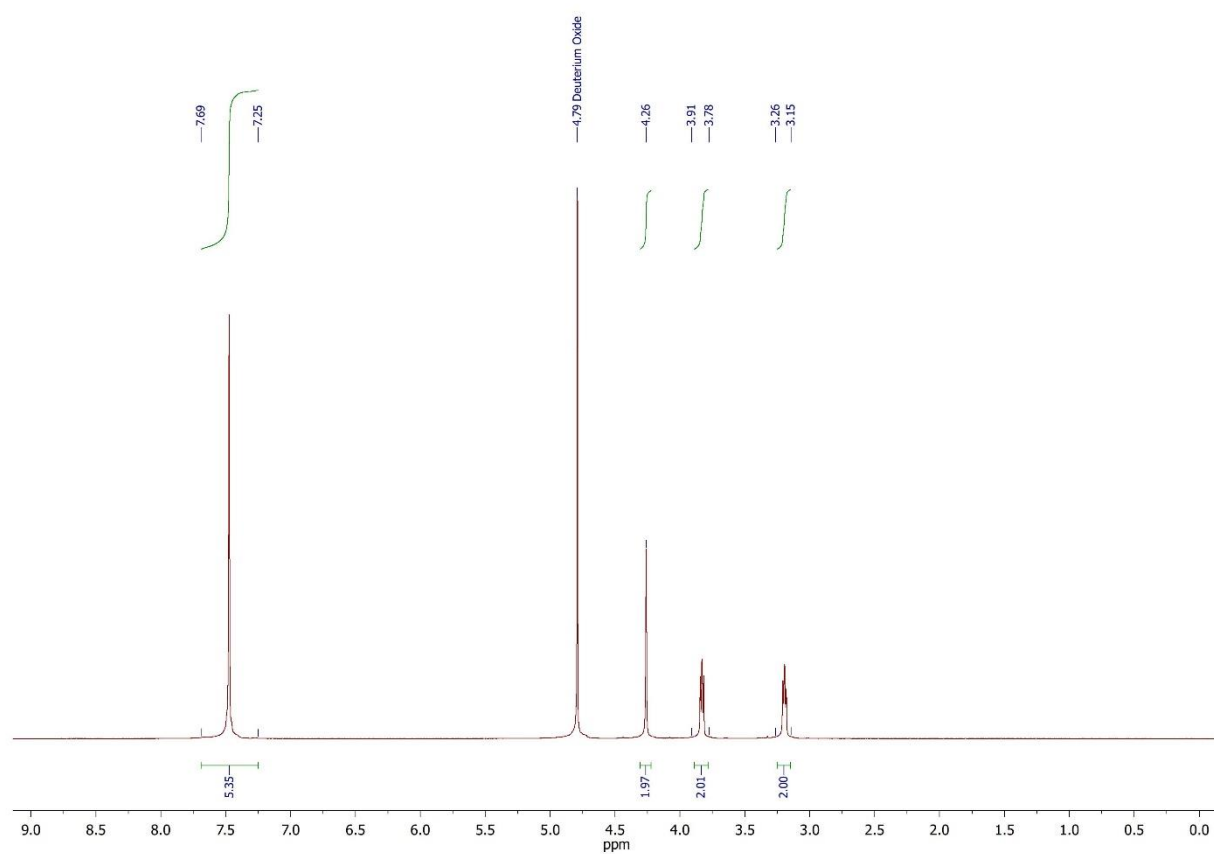

**Figure S30 (a).**  $^1\text{H}$  NMR Spectrum of **15** ( $\text{D}_2\text{O}$ ,  $\delta$ , ppm,  $J$ , Hz)

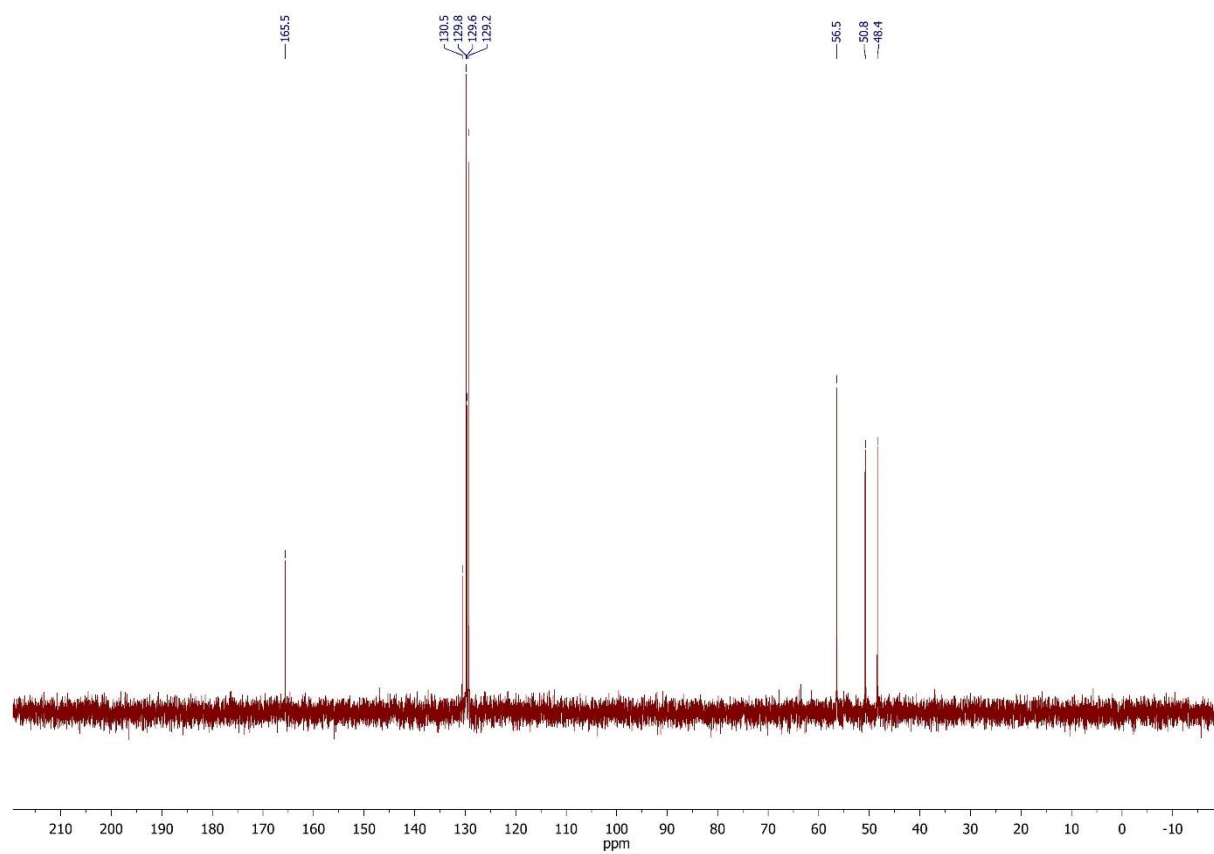

**Figure S30 (b).**  $^{13}\text{C}$  NMR Spectrum of **15** ( $\text{D}_2\text{O}$ ,  $\delta$ , ppm)

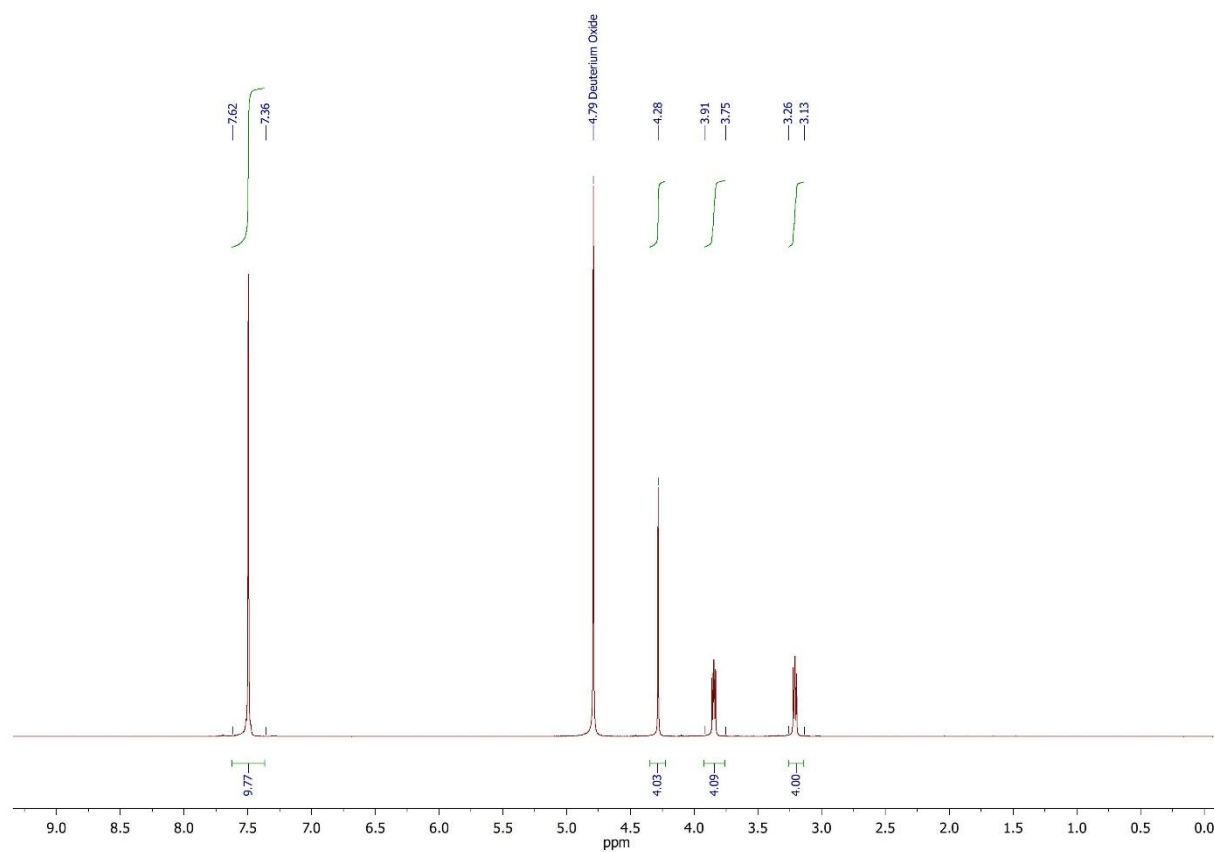

**Figure S31 (a).** <sup>1</sup>H NMR Spectrum of **16** (D<sub>2</sub>O,  $\delta$ , ppm,  $J$ , Hz)

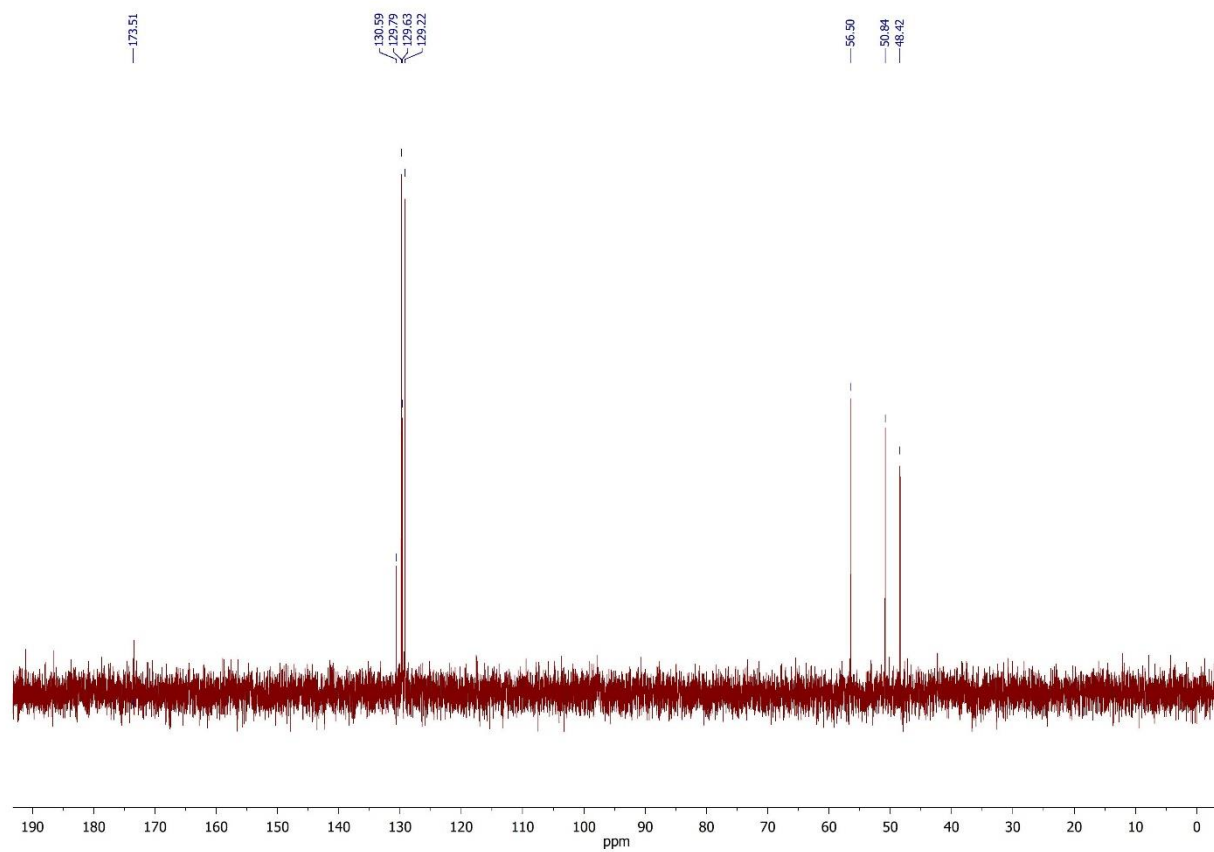

**Figure S31 (b).** <sup>13</sup>C NMR Spectrum of **16** (D<sub>2</sub>O,  $\delta$ , ppm)



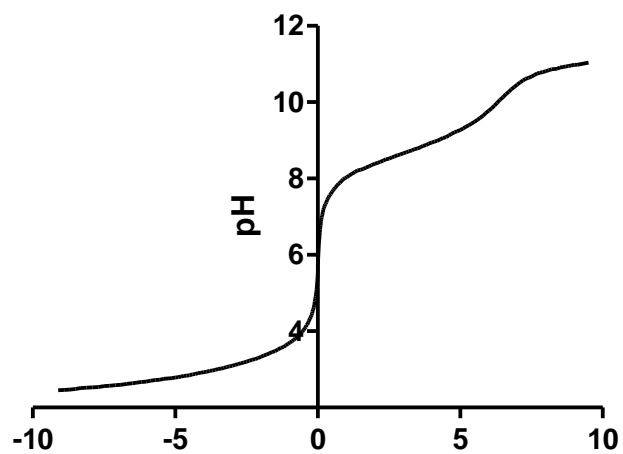

**Figure S32.** pH profile of buffer 3

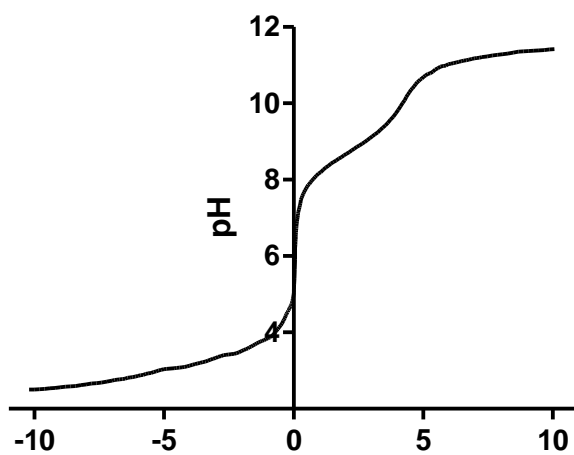

**Figure S33.** pH profile of buffer 4

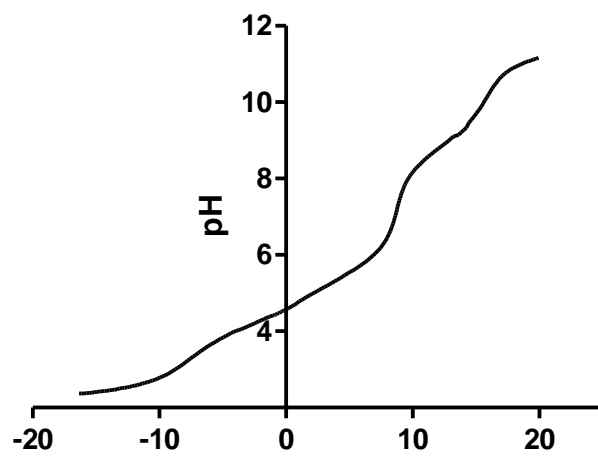

**Figure S34.** pH profile of buffer 12

## NMR ( $^1\text{H}$ , $^{13}\text{C}$ ) spectroscopy data of BEA salts 1-16:

### 1) N-benzylethanolammonium benzoate (1)

$^1\text{H}$  NMR spectrum of **1** ( $\text{D}_2\text{O}$ , ppm): 3.12-3.25 m (2H,  $\text{C}_6\text{H}_5\text{-CH}_2\text{-NH}_2^+\text{-CH}_2\text{-CH}_2\text{-OH}$ ); 3.77-3.88 m (2H,  $\text{C}_6\text{H}_5\text{-CH}_2\text{-NH}_2^+\text{-CH}_2\text{-CH}_2\text{-OH}$ ); 4.25 s (2H,  $\text{C}_6\text{H}_5\text{-CH}_2\text{-NH}_2^+\text{-CH}_2\text{-CH}_2\text{-OH}$ ); 7.39-7.59 m (8H<sub>Ar</sub>); 7.81-7.94 m (2H<sub>Ar</sub>).

$^{13}\text{C}$  NMR spectrum of **1** ( $\text{D}_2\text{O}$ , ppm): 48.4 ( $\text{C}_6\text{H}_5\text{-CH}_2\text{-NH}_2^+\text{-CH}_2\text{-CH}_2\text{-OH}$ ); 50.8 ( $\text{C}_6\text{H}_5\text{-CH}_2\text{-NH}_2^+\text{-CH}_2\text{-CH}_2\text{-OH}$ ); 56.5 ( $\text{C}_6\text{H}_5\text{-CH}_2\text{-NH}_2^+\text{-CH}_2\text{-CH}_2\text{-OH}$ ); 128.3 ( $\text{C}_{\text{ArH}}$ ); 128.8 ( $\text{C}_{\text{ArH}}$ ); 129.2 ( $\text{C}_{\text{ArH}}$ ); 129.6 ( $\text{C}_{\text{ArH}}$ ); 129.8 ( $\text{C}_{\text{ArH}}$ ); 130.5 ( $\text{C}_{\text{Ar}}$ ); 131.5 ( $\text{C}_{\text{ArH}}$ ); 135.3 ( $\text{C}_{\text{Ar}}$ ); 175.1 ( $\text{CO}_2^-$ ).

### 2) N-benzylethanolammonium cinnamate (2)

$^1\text{H}$  NMR spectrum of **2** ( $\text{D}_2\text{O}$ , ppm): 3.07-3.20 m (2H,  $\text{C}_6\text{H}_5\text{-CH}_2\text{-NH}_2^+\text{-CH}_2\text{-CH}_2\text{-OH}$ ); 3.72-3.84 m (2H,  $\text{C}_6\text{H}_5\text{-CH}_2\text{-NH}_2^+\text{-CH}_2\text{-CH}_2\text{-OH}$ ); 4.19 s (2H,  $\text{C}_6\text{H}_5\text{-CH}_2\text{-NH}_2^+\text{-CH}_2\text{-CH}_2\text{-OH}$ ); 6.37-6.52 m (1H,  $\text{C}_6\text{H}_5\text{-CH=CH-CO}_2^-$ ); 7.29-7.34 m (1H,  $\text{C}_6\text{H}_5\text{-CH=CH-CO}_2^-$ ); 7.36-7.47 m (8H<sub>Ar</sub>); 7.51-7.56 m (2H<sub>Ar</sub>).

$^{13}\text{C}$  NMR spectrum of **2** ( $\text{D}_2\text{O}$ , ppm): 48.4 ( $\text{C}_6\text{H}_5\text{-CH}_2\text{-NH}_2^+\text{-CH}_2\text{-CH}_2\text{-OH}$ ); 50.8 ( $\text{C}_6\text{H}_5\text{-CH}_2\text{-NH}_2^+\text{-CH}_2\text{-CH}_2\text{-OH}$ ); 56.5 ( $\text{C}_6\text{H}_5\text{-CH}_2\text{-NH}_2^+\text{-CH}_2\text{-CH}_2\text{-OH}$ ); 123.9 ( $\text{C}_6\text{H}_5\text{CH=CH-CO}_2^-$ ); 127.6 ( $\text{C}_{\text{ArH}}$ ); 128.9 ( $\text{C}_{\text{ArH}}$ ); 129.2 ( $\text{C}_{\text{ArH}}$ ); 129.6 ( $\text{C}_{\text{ArH}}$ ); 129.7 ( $\text{C}_{\text{ArH}}$ ); 130.5 ( $\text{C}_{\text{Ar}}$ ); 135.0 ( $\text{C}_{\text{Ar}}$ ); 140.8 ( $\text{C}_6\text{H}_5\text{CH=CH-CO}_2^-$ ); 175.5 ( $\text{C}_6\text{H}_5\text{-CH=CH-CO}_2^-$ ).

### 3) N-benzylethanolammonium salicylate (3)

$^1\text{H}$  NMR spectrum of **3** ( $\text{D}_2\text{O}$ , ppm): 3.07-3.19 m (2H,  $\text{C}_6\text{H}_5\text{-CH}_2\text{-NH}_2^+\text{-CH}_2\text{-CH}_2\text{-OH}$ ); 3.73-3.86 m (2H,  $\text{C}_6\text{H}_5\text{-CH}_2\text{-NH}_2^+\text{-CH}_2\text{-CH}_2\text{-OH}$ ); 4.19 s (2H,  $\text{C}_6\text{H}_5\text{-CH}_2\text{-NH}_2^+\text{-CH}_2\text{-CH}_2\text{-OH}$ ); 6.79-6.97 m (2H<sub>Ar</sub>); 7.30-7.49 m (6H<sub>Ar</sub>); 7.67-7.82 m (1H<sub>Ar</sub>).

$^{13}\text{C}$  NMR spectrum of **3** ( $\text{D}_2\text{O}$ , ppm): 48.4 ( $\text{C}_6\text{H}_5\text{-CH}_2\text{-NH}_2^+\text{-CH}_2\text{-CH}_2\text{-OH}$ ); 50.8 ( $\text{C}_6\text{H}_5\text{-CH}_2\text{-NH}_2^+\text{-CH}_2\text{-CH}_2\text{-OH}$ ); 56.5 ( $\text{C}_6\text{H}_5\text{-CH}_2\text{-NH}_2^+\text{-CH}_2\text{-CH}_2\text{-OH}$ ); 116.2 ( $\text{C}_{\text{ArH}}$ ); 118.0 ( $\text{C}_{\text{Ar}}$ ); 119.3 ( $\text{C}_{\text{ArH}}$ ); 129.2 ( $\text{C}_{\text{ArH}}$ ); 129.6 ( $\text{C}_{\text{ArH}}$ ); 129.7 ( $\text{C}_{\text{ArH}}$ ); 130.4 ( $\text{C}_{\text{ArH}}$ ); 130.4 ( $\text{C}_{\text{ArH}}$ ); 133.9 ( $\text{C}_{\text{Ar}}$ ); 159.5 ( $\text{C}_{\text{Ar}}$ ); 175.5 ( $\text{CO}_2^-$ ).

### 4) N-benzylethanolammonium 2-methylpnenoxyacetate (5)

$^1\text{H}$  NMR spectrum of **5** ( $\text{D}_2\text{O}$ , ppm): 2.22 c (3H,  $o\text{-CH}_3\text{-C}_6\text{H}_4\text{-O-CH}_2\text{-CO}_2^-$ ); 3.06-3.27 m (2H,  $\text{C}_6\text{H}_5\text{-CH}_2\text{-NH}_2^+\text{-CH}_2\text{-CH}_2\text{-OH}$ ); 3.70-3.92 m (2H,  $\text{C}_6\text{H}_5\text{-CH}_2\text{-NH}_2^+\text{-CH}_2\text{-CH}_2\text{-OH}$ ); 4.19 s (2H,  $\text{C}_6\text{H}_5\text{-CH}_2\text{-NH}_2^+\text{-CH}_2\text{-CH}_2\text{-OH}$ ); 6.79-6.97 m (2H<sub>Ar</sub>); 7.30-7.49 m (6H<sub>Ar</sub>); 7.67-7.82 m (1H<sub>Ar</sub>).

NH<sub>2</sub><sup>+</sup>-CH<sub>2</sub>-CH<sub>2</sub>-OH); 4.22 s (2H, C<sub>6</sub>H<sub>5</sub>-CH<sub>2</sub>-NH<sub>2</sub><sup>+</sup>-CH<sub>2</sub>-CH<sub>2</sub>-OH); 4.43 s (2H, *o*-CH<sub>3</sub>-C<sub>6</sub>H<sub>4</sub>-O-CH<sub>2</sub>-CO<sub>2</sub><sup>-</sup>); 6.68-6.82 m (1H<sub>Ar</sub>); 6.84-6.98 m (1H<sub>Ar</sub>); 7.07-7.27 m (2H<sub>Ar</sub>); 7.35-7.57 m (5H<sub>Ar</sub>).

<sup>13</sup>C NMR spectrum of **5** (D<sub>2</sub>O, ppm): 15.5 (*o*-CH<sub>3</sub>-C<sub>6</sub>H<sub>4</sub>-O-CH<sub>2</sub>-CO<sub>2</sub><sup>-</sup>); 48.4 (C<sub>6</sub>H<sub>5</sub>-CH<sub>2</sub>-NH<sub>2</sub><sup>+</sup>-CH<sub>2</sub>-CH<sub>2</sub>-OH); 50.8 (C<sub>6</sub>H<sub>5</sub>-CH<sub>2</sub>-NH<sub>2</sub><sup>+</sup>-CH<sub>2</sub>-CH<sub>2</sub>-OH); 56.5 (C<sub>6</sub>H<sub>5</sub>-CH<sub>2</sub>-NH<sub>2</sub><sup>+</sup>-CH<sub>2</sub>-CH<sub>2</sub>-OH); 67.0 (*o*-CH<sub>3</sub>-C<sub>6</sub>H<sub>4</sub>-O-CH<sub>2</sub>-CO<sub>2</sub><sup>-</sup>); 111.5 (C<sub>Ar</sub>H); 121.1 (C<sub>Ar</sub>H); 126.8 (C<sub>Ar</sub>H); 127.0 (C<sub>Ar</sub>H); 129.2 (C<sub>Ar</sub>H); 129.6 (C<sub>Ar</sub>H); 129.8 (C<sub>Ar</sub>H); 130.5 (C<sub>Ar</sub>H); 130.9 (C<sub>Ar</sub>H); 156.0 (C<sub>Ar</sub>H); 177.0 (CO<sub>2</sub><sup>-</sup>).

#### 5) N-benzylethanolammonium 4-chloro-2-methylpnenoxyacetate (6)

<sup>1</sup>H NMR spectrum of **6** (D<sub>2</sub>O, ppm): 2.19 s (3H, (Cl)(CH<sub>3</sub>)C<sub>6</sub>H<sub>4</sub>-O-CH<sub>2</sub>-CO<sub>2</sub><sup>-</sup>); 3.08-3.22 m (2H, C<sub>6</sub>H<sub>5</sub>-CH<sub>2</sub>-NH<sub>2</sub><sup>+</sup>-CH<sub>2</sub>-CH<sub>2</sub>-OH); 3.75-3.86 m (2H, C<sub>6</sub>H<sub>5</sub>-CH<sub>2</sub>-NH<sub>2</sub><sup>+</sup>-CH<sub>2</sub>-CH<sub>2</sub>-OH); 4.23 s (2H, C<sub>6</sub>H<sub>5</sub>-CH<sub>2</sub>-NH<sub>2</sub><sup>+</sup>-CH<sub>2</sub>-CH<sub>2</sub>-OH); 4.42 s (2H, (Cl)(CH<sub>3</sub>)C<sub>6</sub>H<sub>4</sub>-O-CH<sub>2</sub>-CO<sub>2</sub><sup>-</sup>); 6.60-6.74 m (1H<sub>Ar</sub>); 7.05-7.21 m (2H<sub>Ar</sub>); 7.33-7.54 m (5H<sub>Ar</sub>).

<sup>13</sup>C NMR spectrum of **6** (D<sub>2</sub>O, ppm): 15.4 ((Cl)(CH<sub>3</sub>)C<sub>6</sub>H<sub>4</sub>-O-CH<sub>2</sub>-CO<sub>2</sub><sup>-</sup>); 48.4 (C<sub>6</sub>H<sub>5</sub>-CH<sub>2</sub>-NH<sub>2</sub><sup>+</sup>-CH<sub>2</sub>-CH<sub>2</sub>-OH); 50.8 (C<sub>6</sub>H<sub>5</sub>-CH<sub>2</sub>-NH<sub>2</sub><sup>+</sup>-CH<sub>2</sub>-CH<sub>2</sub>-OH); 56.5 (C<sub>6</sub>H<sub>5</sub>-CH<sub>2</sub>-NH<sub>2</sub><sup>+</sup>-CH<sub>2</sub>-CH<sub>2</sub>-OH); 67.1 ((Cl)(CH<sub>3</sub>)C<sub>6</sub>H<sub>4</sub>-O-CH<sub>2</sub>-CO<sub>2</sub><sup>-</sup>); 112.6 (C<sub>Ar</sub>H); 124.9 (C<sub>Ar</sub>H); 126.3 (C<sub>Ar</sub>H); 128.9 (C<sub>Ar</sub>H); 129.2 (C<sub>Ar</sub>H); 129.6 (C<sub>Ar</sub>H); 129.8 (C<sub>Ar</sub>H); 130.3 (C<sub>Ar</sub>H); 130.5 (C<sub>Ar</sub>H); 154.6 (C<sub>Ar</sub>H); 176.7 (CO<sub>2</sub><sup>-</sup>).

#### 6) N-benzylethanolammonium hydrogen phthalate (7)

<sup>1</sup>H NMR spectrum of **7** (D<sub>2</sub>O, ppm): 3.08-3.19 m (2H, C<sub>6</sub>H<sub>5</sub>-CH<sub>2</sub>-NH<sub>2</sub><sup>+</sup>-CH<sub>2</sub>-CH<sub>2</sub>-OH); 3.68-3.87 m (2H, C<sub>6</sub>H<sub>5</sub>-CH<sub>2</sub>-NH<sub>2</sub><sup>+</sup>-CH<sub>2</sub>-CH<sub>2</sub>-OH); 4.20 s (2H, C<sub>6</sub>H<sub>5</sub>-CH<sub>2</sub>-NH<sub>2</sub><sup>+</sup>-CH<sub>2</sub>-CH<sub>2</sub>-OH); 7.37-7.47 m (5H<sub>Ar</sub>); 7.47-7.55 m (2H<sub>Ar</sub>); 7.65-7.70 m (2H<sub>Ar</sub>).

<sup>13</sup>C NMR spectrum of **7** (D<sub>2</sub>O, ppm): 48.4 (C<sub>6</sub>H<sub>5</sub>-CH<sub>2</sub>-NH<sub>2</sub><sup>+</sup>-CH<sub>2</sub>-CH<sub>2</sub>-OH); 50.8 (C<sub>6</sub>H<sub>5</sub>-CH<sub>2</sub>-NH<sub>2</sub><sup>+</sup>-CH<sub>2</sub>-CH<sub>2</sub>-OH); 56.5 (C<sub>6</sub>H<sub>5</sub>-CH<sub>2</sub>-NH<sub>2</sub><sup>+</sup>-CH<sub>2</sub>-CH<sub>2</sub>-OH); 128.7 (C<sub>Ar</sub>H); 129.2 (C<sub>Ar</sub>H); 129.6 (C<sub>Ar</sub>H); 129.7 (C<sub>Ar</sub>H); 130.5 (C<sub>Ar</sub>H); 130.7 (C<sub>Ar</sub>H); 133.7 (C<sub>Ar</sub>H); 174.0 (HO<sub>2</sub>C-C<sub>6</sub>H<sub>4</sub>-CO<sub>2</sub><sup>-</sup>).

#### 7) N-benzylethanolammonium phthalate (8)

$^1\text{H}$  NMR spectrum of **8** ( $\text{D}_2\text{O}$ , ppm): 3.09-3.25 m (4H,  $\text{C}_6\text{H}_5\text{-CH}_2\text{-NH}_2^+\text{-CH}_2\text{-CH}_2\text{-OH}$ ); 3.75-3.89 m (4H,  $\text{C}_6\text{H}_5\text{-CH}_2\text{-NH}_2^+\text{-CH}_2\text{-CH}_2\text{-OH}$ ); 4.22 s (4H,  $\text{C}_6\text{H}_5\text{-CH}_2\text{-NH}_2^+\text{-CH}_2\text{-CH}_2\text{-OH}$ ); 7.38-7.44 m ( $12\text{H}_{\text{Ar}}$ ); 7.70-7.79 m ( $2\text{H}_{\text{Ar}}$ ).

$^{13}\text{C}$  NMR spectrum of **8** ( $\text{D}_2\text{O}$ , ppm): 48.8 ( $\text{C}_6\text{H}_5\text{-CH}_2\text{-NH}_2^+\text{-CH}_2\text{-CH}_2\text{-OH}$ ); 50.4 ( $\text{C}_6\text{H}_5\text{-CH}_2\text{-NH}_2^+\text{-CH}_2\text{-CH}_2\text{-OH}$ ); 56.8 ( $\text{C}_6\text{H}_5\text{-CH}_2\text{-NH}_2^+\text{-CH}_2\text{-CH}_2\text{-OH}$ ); 129.2 ( $\text{C}_{\text{ArH}}$ ); 129.5 ( $\text{C}_{\text{ArH}}$ ); 130.5 ( $\text{C}_{\text{ArH}}$ ); 131.0 ( $\text{C}_{\text{ArH}}$ ); 131.2 ( $\text{C}_{\text{ArH}}$ ); 132.3 ( $\text{C}_{\text{ArH}}$ ); 134.5 ( $\text{C}_{\text{ArH}}$ ); 168.8 ( $^-\text{O}_2\text{C-C}_6\text{H}_4\text{-CO}_2^-$ ).

### **8) N-benzylethanolammonium trihydrogen pyromellitate (9)**

$^1\text{H}$  NMR spectrum of **9** ( $\text{D}_2\text{O}$ , ppm): 3.12-3.19 m (2H,  $\text{C}_6\text{H}_5\text{-CH}_2\text{-NH}_2^+\text{-CH}_2\text{-CH}_2\text{-OH}$ ); 3.77-3.84 m (2H,  $\text{C}_6\text{H}_5\text{-CH}_2\text{-NH}_2^+\text{-CH}_2\text{-CH}_2\text{-OH}$ ); 4.21 s (2H,  $\text{C}_6\text{H}_5\text{-CH}_2\text{-NH}_2^+\text{-CH}_2\text{-CH}_2\text{-OH}$ ); 7.37-7.49 m ( $5\text{H}_{\text{Ar}}$ ); 7.97-8.04 m ( $2\text{H}_{\text{Ar}}$ ).

$^{13}\text{C}$  NMR spectrum of **9** ( $\text{D}_2\text{O}$ , ppm): 48.4 ( $\text{C}_6\text{H}_5\text{-CH}_2\text{-NH}_2^+\text{-CH}_2\text{-CH}_2\text{-OH}$ ); 50.8 ( $\text{C}_6\text{H}_5\text{-CH}_2\text{-NH}_2^+\text{-CH}_2\text{-CH}_2\text{-OH}$ ); 56.5 ( $\text{C}_6\text{H}_5\text{-CH}_2\text{-NH}_2^+\text{-CH}_2\text{-CH}_2\text{-OH}$ ); 129.1 ( $\text{C}_{\text{ArH}}$ ); 129.2 ( $\text{C}_{\text{ArH}}$ ); 129.6 ( $\text{C}_{\text{ArH}}$ ); 129.7 ( $\text{C}_{\text{ArH}}$ ); 130.5 ( $\text{C}_{\text{ArH}}$ ); 134.9 ( $\text{C}_{\text{ArH}}$ ); 171.0 ( $(\text{HO}_2\text{C})_3\text{-C}_6\text{H}_5\text{-CO}_2^-$ ).

### **9) N-benzylethanolammonium dihydrogen pyromellitate (10)**

$^1\text{H}$  NMR spectrum of **10** ( $\text{D}_2\text{O}$ , ppm): 3.13-3.20 m (4H,  $\text{C}_6\text{H}_5\text{-CH}_2\text{-NH}_2^+\text{-CH}_2\text{-CH}_2\text{-OH}$ ); 3.76-3.85 m (4H,  $\text{C}_6\text{H}_5\text{-CH}_2\text{-NH}_2^+\text{-CH}_2\text{-CH}_2\text{-OH}$ ); 4.22 s (2H,  $\text{C}_6\text{H}_5\text{-CH}_2\text{-NH}_2^+\text{-CH}_2\text{-CH}_2\text{-OH}$ ); 7.36-7.50 m ( $10\text{H}_{\text{Ar}}$ ); 7.87-7.95 m ( $2\text{H}_{\text{Ar}}$ ).

$^{13}\text{C}$  NMR spectrum of **10** ( $\text{D}_2\text{O}$ , ppm): 48.4 ( $\text{C}_6\text{H}_5\text{-CH}_2\text{-NH}_2^+\text{-CH}_2\text{-CH}_2\text{-OH}$ ); 50.8 ( $\text{C}_6\text{H}_5\text{-CH}_2\text{-NH}_2^+\text{-CH}_2\text{-CH}_2\text{-OH}$ ); 56.5 ( $\text{C}_6\text{H}_5\text{-CH}_2\text{-NH}_2^+\text{-CH}_2\text{-CH}_2\text{-OH}$ ); 129.0 ( $\text{C}_{\text{ArH}}$ ); 129.2 ( $\text{C}_{\text{ArH}}$ ); 129.6 ( $\text{C}_{\text{ArH}}$ ); 129.7 ( $\text{C}_{\text{ArH}}$ ); 130.5 ( $\text{C}_{\text{ArH}}$ ); 135.6 ( $\text{C}_{\text{ArH}}$ ); 172.2 ( $(\text{HO}_2\text{C})_2\text{-C}_6\text{H}_5\text{-(CO}_2^-)_2$ ).

### **10) N-benzylethanolammonium hydrogen succinate (11)**

$^1\text{H}$  NMR spectrum of **11** ( $\text{D}_2\text{O}$ , ppm): 2.49 s (4H,  $\text{COOH-CH}_2\text{-CH}_2\text{-CO}_2^-$ ); 3.12-3.23 m (2H,  $\text{C}_6\text{H}_5\text{-CH}_2\text{-NH}_2^+\text{-CH}_2\text{-CH}_2\text{-OH}$ ); 3.76-3.90 m (2H,  $\text{C}_6\text{H}_5\text{-CH}_2\text{-NH}_2^+\text{-CH}_2\text{-CH}_2\text{-OH}$ ); 4.26 s (2H,  $\text{C}_6\text{H}_5\text{-CH}_2\text{-NH}_2^+\text{-CH}_2\text{-CH}_2\text{-OH}$ ); 7.31-7.69 m ( $5\text{H}_{\text{Ar}}$ ).

$^{13}\text{C}$  NMR spectrum of **11** ( $\text{D}_2\text{O}$ , ppm): 31.2 ( $\text{COOH-CH}_2\text{-CH}_2\text{-CO}_2^-$ ); 48.4 ( $\text{C}_6\text{H}_5\text{-CH}_2\text{-NH}_2^+\text{-CH}_2\text{-CH}_2\text{-OH}$ ); 50.8 ( $\text{C}_6\text{H}_5\text{-CH}_2\text{-NH}_2^+\text{-CH}_2\text{-CH}_2\text{-OH}$ ); 56.5

(C<sub>6</sub>H<sub>5</sub>-CH<sub>2</sub>-NH<sub>2</sub><sup>+</sup>-CH<sub>2</sub>-CH<sub>2</sub>-OH); 129.2 (C<sub>Ar</sub>H); 129.6 (C<sub>Ar</sub>H); 129.8 (C<sub>Ar</sub>H); 130.6 (C<sub>Ar</sub>); 179.6 (COOH-CH<sub>2</sub>-CH<sub>2</sub>-CO<sub>2</sub><sup>-</sup>).

### 11) N-benzylethanolammonium succinate (12)

<sup>1</sup>H NMR spectrum of **12** (D<sub>2</sub>O, ppm): 2.53 s (4H, <sup>-</sup>O<sub>2</sub>C-CH<sub>2</sub>-CH<sub>2</sub>-CO<sub>2</sub><sup>-</sup>); 3.11-3.28 m (4H, C<sub>6</sub>H<sub>5</sub>-CH<sub>2</sub>-NH<sub>2</sub><sup>+</sup>-CH<sub>2</sub>-CH<sub>2</sub>-OH); 3.77-3.91 m (4H, C<sub>6</sub>H<sub>5</sub>-CH<sub>2</sub>-NH<sub>2</sub><sup>+</sup>-CH<sub>2</sub>-CH<sub>2</sub>-OH); 4.27 s (4H, C<sub>6</sub>H<sub>5</sub>-CH<sub>2</sub>-NH<sub>2</sub><sup>+</sup>-CH<sub>2</sub>-CH<sub>2</sub>-OH); 7.25-7.77 m (10H<sub>Ar</sub>).

<sup>13</sup>C NMR spectrum of **12** (D<sub>2</sub>O, ppm): 30.8 (<sup>-</sup>O<sub>2</sub>C-CH<sub>2</sub>-CH<sub>2</sub>-CO<sub>2</sub><sup>-</sup>); 48.4 (C<sub>6</sub>H<sub>5</sub>-CH<sub>2</sub>-NH<sub>2</sub><sup>+</sup>-CH<sub>2</sub>-CH<sub>2</sub>-OH); 50.8 (C<sub>6</sub>H<sub>5</sub>-CH<sub>2</sub>-NH<sub>2</sub><sup>+</sup>-CH<sub>2</sub>-CH<sub>2</sub>-OH); 56.5 (C<sub>6</sub>H<sub>5</sub>-CH<sub>2</sub>-NH<sub>2</sub><sup>+</sup>-CH<sub>2</sub>-CH<sub>2</sub>-OH); 129.2 (C<sub>Ar</sub>H); 129.6 (C<sub>Ar</sub>H); 129.8 (C<sub>Ar</sub>H); 130.6 (C<sub>Ar</sub>); 179.2 (<sup>-</sup>O<sub>2</sub>C-CH<sub>2</sub>-CH<sub>2</sub>-CO<sub>2</sub><sup>-</sup>).

### 12) N-benzylethanolammonium hydrogen malonate (13)

<sup>1</sup>H NMR spectrum of **13** (D<sub>2</sub>O, ppm): 2.89-3.01 m (2H, HO<sub>2</sub>C-CH<sub>2</sub>-CO<sub>2</sub><sup>-</sup>); 3.13-3.23 m (2H, C<sub>6</sub>H<sub>5</sub>-CH<sub>2</sub>-NH<sub>2</sub><sup>+</sup>-CH<sub>2</sub>-CH<sub>2</sub>-OH); 3.77-3.88 m (2H, C<sub>6</sub>H<sub>5</sub>-CH<sub>2</sub>-NH<sub>2</sub><sup>+</sup>-CH<sub>2</sub>-CH<sub>2</sub>-OH); 4.26 s (2H, C<sub>6</sub>H<sub>5</sub>-CH<sub>2</sub>-NH<sub>2</sub><sup>+</sup>-CH<sub>2</sub>-CH<sub>2</sub>-OH); 7.40-7.67 m (5H<sub>Ar</sub>).

<sup>13</sup>C NMR spectrum of **13** (D<sub>2</sub>O, ppm): 39.6 (HO<sub>2</sub>C-CH<sub>2</sub>-CO<sub>2</sub><sup>-</sup>); 48.4 (C<sub>6</sub>H<sub>5</sub>-CH<sub>2</sub>-NH<sub>2</sub><sup>+</sup>-CH<sub>2</sub>-CH<sub>2</sub>-OH); 50.8 (C<sub>6</sub>H<sub>5</sub>-CH<sub>2</sub>-NH<sub>2</sub><sup>+</sup>-CH<sub>2</sub>-CH<sub>2</sub>-OH); 56.5 (C<sub>6</sub>H<sub>5</sub>-CH<sub>2</sub>-NH<sub>2</sub><sup>+</sup>-CH<sub>2</sub>-CH<sub>2</sub>-OH); 129.2 (C<sub>Ar</sub>H); 129.6 (C<sub>Ar</sub>H); 129.8 (C<sub>Ar</sub>H); 130.6 (C<sub>Ar</sub>); 174.6 (HO<sub>2</sub>C-CH<sub>2</sub>-CO<sub>2</sub><sup>-</sup>).

### 13) N-benzylethanolammonium malonate (14)

<sup>1</sup>H NMR spectrum of **14** (D<sub>2</sub>O, ppm): 2.82 s (2H, <sup>-</sup>O<sub>2</sub>C-CH<sub>2</sub>-CO<sub>2</sub><sup>-</sup>); 3.14-3.22 m (4H, C<sub>6</sub>H<sub>5</sub>-CH<sub>2</sub>-NH<sub>2</sub><sup>+</sup>-CH<sub>2</sub>-CH<sub>2</sub>-OH); 3.78-3.87 m (4H, C<sub>6</sub>H<sub>5</sub>-CH<sub>2</sub>-NH<sub>2</sub><sup>+</sup>-CH<sub>2</sub>-CH<sub>2</sub>-OH); 4.26 s (4H, C<sub>6</sub>H<sub>5</sub>-CH<sub>2</sub>-NH<sub>2</sub><sup>+</sup>-CH<sub>2</sub>-CH<sub>2</sub>-OH); 7.32-7.64 m (10H<sub>Ar</sub>).

<sup>13</sup>C NMR spectrum of **14** (D<sub>2</sub>O, ppm): 39.1 (<sup>-</sup>O<sub>2</sub>C-CH<sub>2</sub>-CO<sub>2</sub><sup>-</sup>); 48.4 (C<sub>6</sub>H<sub>5</sub>-CH<sub>2</sub>-NH<sub>2</sub><sup>+</sup>-CH<sub>2</sub>-CH<sub>2</sub>-OH); 50.8 (C<sub>6</sub>H<sub>5</sub>-CH<sub>2</sub>-NH<sub>2</sub><sup>+</sup>-CH<sub>2</sub>-CH<sub>2</sub>-OH); 56.5 (C<sub>6</sub>H<sub>5</sub>-CH<sub>2</sub>-NH<sub>2</sub><sup>+</sup>-CH<sub>2</sub>-CH<sub>2</sub>-OH); 129.2 (C<sub>Ar</sub>H); 129.6 (C<sub>Ar</sub>H); 129.8 (C<sub>Ar</sub>H); 130.6 (C<sub>Ar</sub>); 177.3 (<sup>-</sup>O<sub>2</sub>C-CH<sub>2</sub>-CO<sub>2</sub><sup>-</sup>).

### 14) N-benzylethanolammonium hydrogen oxalate (15)

$^1\text{H}$  NMR spectrum of **15** ( $\text{D}_2\text{O}$ , ppm): 3.15-3.26 m (2H,  $\text{C}_6\text{H}_5\text{-CH}_2\text{-NH}_2^+\text{-CH}_2\text{-CH}_2\text{-OH}$ ); 3.78-3.91 m (2H,  $\text{C}_6\text{H}_5\text{-CH}_2\text{-NH}_2^+\text{-CH}_2\text{-CH}_2\text{-OH}$ ); 4.26 s (2H,  $\text{C}_6\text{H}_5\text{-CH}_2\text{-NH}_2^+\text{-CH}_2\text{-CH}_2\text{-OH}$ ); 7.25-7.69 m ( $5\text{H}_{\text{Ar}}$ ).

$^{13}\text{C}$  NMR spectrum of **15** ( $\text{D}_2\text{O}$ , ppm): 48.4 ( $\text{C}_6\text{H}_5\text{-CH}_2\text{-NH}_2^+\text{-CH}_2\text{-CH}_2\text{-OH}$ ); 50.8 ( $\text{C}_6\text{H}_5\text{-CH}_2\text{-NH}_2^+\text{-CH}_2\text{-CH}_2\text{-OH}$ ); 56.5 ( $\text{C}_6\text{H}_5\text{-CH}_2\text{-NH}_2^+\text{-CH}_2\text{-CH}_2\text{-OH}$ ); 129.2 ( $\text{C}_{\text{Ar}}\text{H}$ ); 129.6 ( $\text{C}_{\text{Ar}}\text{H}$ ); 129.8 ( $\text{C}_{\text{Ar}}\text{H}$ ); 130.5 ( $\text{C}_{\text{Ar}}$ ); 165.5 ( $\text{HO}_2\text{C-CO}_2^-$ ).

### **15) N-benzylethanolammonium oxalate (16)**

$^1\text{H}$  NMR spectrum of **16** ( $\text{D}_2\text{O}$ , ppm): 3.13-3.26 m (4H,  $\text{C}_6\text{H}_5\text{-CH}_2\text{-NH}_2^+\text{-CH}_2\text{-CH}_2\text{-OH}$ ); 3.75-3.91 m (4H,  $\text{C}_6\text{H}_5\text{-CH}_2\text{-NH}_2^+\text{-CH}_2\text{-CH}_2\text{-OH}$ ); 4.28 s (4H,  $\text{C}_6\text{H}_5\text{-CH}_2\text{-NH}_2^+\text{-CH}_2\text{-CH}_2\text{-OH}$ ); 7.36-7.62 m ( $10\text{H}_{\text{Ar}}$ ).

$^{13}\text{C}$  NMR spectrum of **16** ( $\text{D}_2\text{O}$ , ppm): 48.4 ( $\text{C}_6\text{H}_5\text{-CH}_2\text{-NH}_2^+\text{-CH}_2\text{-CH}_2\text{-OH}$ ); 50.8 ( $\text{C}_6\text{H}_5\text{-CH}_2\text{-NH}_2^+\text{-CH}_2\text{-CH}_2\text{-OH}$ ); 56.5 ( $\text{C}_6\text{H}_5\text{-CH}_2\text{-NH}_2^+\text{-CH}_2\text{-CH}_2\text{-OH}$ ); 129.2 ( $\text{C}_{\text{Ar}}\text{H}$ ); 129.6 ( $\text{C}_{\text{Ar}}\text{H}$ ); 129.8 ( $\text{C}_{\text{Ar}}\text{H}$ ); 130.6 ( $\text{C}_{\text{Ar}}$ ); 173.5 ( $^-\text{O}_2\text{C-CO}_2^-$ ).

**Table S1. pH value of reaction mixtures for  $^{68}\text{Ga}$ - and  $\text{Al}^{18}\text{F}$ -radiolabeling reactions**

| BEA Salt  | pH of reaction mixture          |                                         |
|-----------|---------------------------------|-----------------------------------------|
|           | $^{68}\text{Ga}$ -radiolabeling | $\text{Al}^{18}\text{F}$ -radiolabeling |
| <b>1</b>  | 4.1                             | 6.1                                     |
| <b>2</b>  | 5.4                             | 6.3                                     |
| <b>3</b>  | 3.0                             | 5.5                                     |
| <b>4</b>  | 5.1                             | 5.4                                     |
| <b>5</b>  | 4.3                             | 5.8                                     |
| <b>6</b>  | 3.9                             | 5.7                                     |
| <b>7</b>  | 2.6                             | 5.4                                     |
| <b>8</b>  | 2.9                             | 4.3                                     |
| <b>9</b>  | 1.8                             | 3.6                                     |
| <b>10</b> | 2.7                             | 4.7                                     |
| <b>11</b> | 3.9                             | 6.0                                     |
| <b>12</b> | 4.2                             | 5.8                                     |
| <b>13</b> | 2.8                             | 5.5                                     |
| <b>14</b> | 5.5                             | 7.5                                     |
| <b>15</b> | 1.6                             | 4.6                                     |
| <b>16</b> | 4.1                             | 4.3                                     |
